# Supplementary material
Source: PubMed Central journal article supplement (PMC7196277)
Supplement: NIHMS1582428-supplement-SI.pdf [file NIHMS1582428-supplement-SI.pdf]

# Supporting Information

## A Well-Balanced Force Field *ff03CMAP* for Folded and Disordered Proteins

Yangpeng Zhang<sup>1,#</sup>, Hao Liu<sup>1,#</sup>, Sheng Yang<sup>1,#</sup>, Ray Luo<sup>2,\*</sup>, and Hai-Feng Chen<sup>1,3,\*</sup>

<sup>1</sup>*State Key Laboratory of Microbial metabolism, Department of Bioinformatics and Biostatistics, National Experimental Teaching Center for Life Sciences and Biotechnology, School of Life Sciences and Biotechnology, Shanghai Jiao Tong University, Shanghai, 200240, China*

<sup>2</sup>*Departments of Molecular Biology and Biochemistry, Chemical and Molecular Engineering, and Materials Science and Engineering, and Biomedical Engineering, University of California, Irvine, USA*

<sup>3</sup>*Shanghai Center for Bioinformation Technology, Shanghai, 200235, China*

#These authors contributed equally to this work.

\*Corresponding authors

Email addresses: [haifengchen@sjtu.edu.cn](mailto:haifengchen@sjtu.edu.cn); [ray.luo@rayluolab.org](mailto:ray.luo@rayluolab.org)

Tel: 86-21-34204348

Fax: 86-21-34204348

The authors declare that there is no conflict of interest.

**Half-time Convergence Analysis.** In this study, we calculated time-dependent cumulative averages of simulated average unsigned errors (AUE) of  $C\alpha$  chemical shifts as NMR observable. And using biphasic decay model to evaluate the convergence rate that simulated observables tend to balance. We focused on the slow stage and calculated the half-time of the slow stage. The fitting model of biphasic exponential decay for all IDPs is shown in Figure S35. The figure indicates that the two *ff03CMAP* force fields have smaller  $\tau_2 \ln(2)$  (half-time of the slow stage) and lower  $N_0$  (plateau) than other force fields, which suggested the efficient convergence for IDP.

The average half-time of simulated IDPs for six *ff03*-series force field is gathered in Table S23. It is obvious that the average half-time and standard deviation of *ff03CMAP* are smaller than others. Moreover, the plateaus of the  $C\alpha$  chemical shifts for *ff03CMAP* force fields are lower from the details of modeling parameters. These results suggested that *ff03CMAP* force fields are more efficient than other *ff03*-series force fields.

**Definition of AAQAA3 Helicity.** In this work, the definition of the helicity we calculated is from the *Best*'s work published in 2009.<sup>[1]</sup> The definition of a given residue is helical is that this residue is one of the residues in helical fragment. Helical fragment is defined as a fragment has at least three consecutive residues whose  $(\phi, \psi)$  angles fall within the  $R_h$  boundaries (The  $R_h$  region of the  $(\phi, \psi)$  map is defined more stringently as  $\phi \in [-100^\circ, -30^\circ]$  and  $\psi \in [-67^\circ, -7^\circ]$ ).

**Table S1.** Simulation condition for all tested protein or peptide system.

| System                      | Description                                                                        | Length | Initial Structure | Simulation Temperature/<br>K | Ions              | Number of Waters | Simulation Time/ns | Number of Tested Force Field | Number of Trajectories or Replicas |
|-----------------------------|------------------------------------------------------------------------------------|--------|-------------------|------------------------------|-------------------|------------------|--------------------|------------------------------|------------------------------------|
| <b>Peptide</b>              |                                                                                    |        |                   |                              |                   |                  |                    |                              |                                    |
| ALA5                        | A-A-A-A-A                                                                          | 5      | Extended          | 300                          | None              | 1349-1359        | 200                | 6                            | 5                                  |
| <b>Folded Protein</b>       |                                                                                    |        |                   |                              |                   |                  |                    |                              |                                    |
| GB3                         | Third Immunoglobulin Binding Domain of Protein G                                   | 56     | PDB 1P7E          | 298                          | 50mM NaCl         | 3318-3371        | 1000               | 6                            | 1                                  |
| BPTI                        | Free Bovine Pancreatic Trypsin Inhibitor                                           | 58     | PDB 5PTI          | 309                          | None              | 4580-5453        | 1000               | 6                            | 1                                  |
| CspTm                       | Cold-shock Protein from the Hyperthermophilic Bacterium <i>Thermotoga maritima</i> | 66     | PDB 1G6P          | 303                          | 150mM NaCl        | 4253-4313        | 1000               | 6                            | 1                                  |
| ubiquitin                   | Ubiquitin of Human                                                                 | 76     | PDB 1UBQ          | 298                          | 50mM NaCl         | 4589-4669        | 1000               | 6                            | 1                                  |
| SPR17                       | Chicken brain alpha spectrin repeat 17                                             | 118    | PDB 1CUN          | 298                          | 100mM NaCl        | 9447-9529        | 1000               | 6                            | 1                                  |
| <b>Disordered Protein</b>   |                                                                                    |        |                   |                              |                   |                  |                    |                              |                                    |
| HEWL19                      | Hen Egg-White Lysozyme(19)                                                         | 19     | Extended          | 293                          | 2Cl <sup>-</sup>  | 11245-11425      | 200                | 6                            | 5                                  |
| RS                          | Phosphorylated SRSF1                                                               | 24     | Modeling          | 298                          | 100mM NaCl        | 7277-8323        | 200                | 6                            | 5                                  |
| HIVRev                      | HIV-1 Rev ARM peptide                                                              | 26     | Modeling          | 283                          | 10Cl <sup>-</sup> | 4617-4878        | 200                | 6                            | 5                                  |
| Aβ40                        | Amyloid-beta-peptides(1-40)                                                        | 40     | Modeling          | 277                          | 100mM NaCl        | 8154-8285        | 200                | 7                            | 5                                  |
| Aβ42                        | Amyloid-beta-peptides(1-42)                                                        | 42     | PDB 1Z0Q          | 273                          | 20mM NaCl         | 12264-12367      | 400                | 6                            | 5                                  |
| ACTR                        | Activation Domain of the Nuclear Hormone Receptor Coactivator                      | 71     | Modeling          | 304.15                       | 50mM NaCl         | 12260-12600      | 200                | 7                            | 5                                  |
| IA3                         | An Aspartic Proteinase Inhibitor for <i>Saccharomyces cerevisiae</i>               | 76     | Modeling          | 293                          | 150mM NaCl        | 10854-11060      | 200                | 7                            | 5                                  |
| p53N                        | p53 N-terminal Transactivation Domain                                              | 93     | PDB 1YCR          | 293                          | 175mM NaCl        | 6128-7075        | 200                | 6                            | 5                                  |
| tauF4                       | Tau Protein Fragment                                                               | 124    | Modeling          | 293                          | 25mM NaCl         | 11484-14126      | 200                | 6                            | 5                                  |
| <b>Fast-Folding Protein</b> |                                                                                    |        |                   |                              |                   |                  |                    |                              |                                    |
| CLN025                      | Chignolin, a 10-residue folded peptide designed by segment statistics              | 10     | Extended          | 273.00-424.35                | 2Na <sup>+</sup>  | 2194             | 400                | 2                            | 32                                 |

---

|        |                                                     |    |          |               |                  |      |     |   |    |
|--------|-----------------------------------------------------|----|----------|---------------|------------------|------|-----|---|----|
| AAQAA3 | 15-residue helix-forming peptide<br>Ac-(AAQAA)3-NH2 | 15 | Extended | 278.00-391.21 | None             | 3265 | 400 | 2 | 30 |
| GB1    | $\beta$ -hairpin B1 domain of protein G             | 16 | Extended | 274.00-381.47 | 3Na <sup>+</sup> | 3502 | 600 | 2 | 30 |

---



**Table S2.** Experimental measurements used in this work.

| <b>Protein</b>              |                                                                                                                                                                                                                                                                                                                                                                                                                                                                                                                                                                                                                                    | <b>Experimental Measurements</b> |
|-----------------------------|------------------------------------------------------------------------------------------------------------------------------------------------------------------------------------------------------------------------------------------------------------------------------------------------------------------------------------------------------------------------------------------------------------------------------------------------------------------------------------------------------------------------------------------------------------------------------------------------------------------------------------|----------------------------------|
| <b>Peptide</b>              |                                                                                                                                                                                                                                                                                                                                                                                                                                                                                                                                                                                                                                    |                                  |
| ALA5                        | Backbone C $\alpha$ , C $\beta$ , C, N, H $\alpha$ and HN chemical shifts, backbone $^1J_{C\alpha N}$ , $^2J_{C\alpha N}$ , $^3J_{HNH\alpha}$ , $^3J_{HNC\alpha}$ , $^3J_{HNC\beta}$ , $^3J_{H\alpha C}$ and $^3J_{HNC}$ scalar couplings <sup>[2]</sup>                                                                                                                                                                                                                                                                                                                                                                           |                                  |
| <b>Folded Protein</b>       |                                                                                                                                                                                                                                                                                                                                                                                                                                                                                                                                                                                                                                    |                                  |
| GB3                         | Backbone C $\alpha$ , C $\beta$ , N, H $\alpha$ and HN chemical shifts, <sup>[3]</sup> backbone $^3J_{HNH\alpha}$ , $^3J_{HNC\beta}$ and $^3J_{H\alpha C}$ scalar couplings, <sup>[4]</sup> backbone amide S2 order parameters <sup>[5]</sup>                                                                                                                                                                                                                                                                                                                                                                                      |                                  |
| BPTI                        | Backbone C $\alpha$ , C $\beta$ , C, N, H $\alpha$ and HN chemical shifts, <sup>[6]</sup> backbone $^3J_{HNH\alpha}$ , $^3J_{HNC\beta}$ , $^3J_{H\alpha C}$ and $^3J_{HNC}$ scalar couplings <sup>[7]</sup>                                                                                                                                                                                                                                                                                                                                                                                                                        |                                  |
| CspTm                       | Backbone C $\alpha$ , C $\beta$ , C, N, H $\alpha$ and HN chemical shifts <sup>[8]</sup>                                                                                                                                                                                                                                                                                                                                                                                                                                                                                                                                           |                                  |
| ubiquitin                   | Backbone C $\alpha$ , C $\beta$ , C, N, H $\alpha$ and HN chemical shifts, <sup>[9]</sup> backbone $^1J_{H\alpha C\alpha}$ , $^1J_{C\alpha C\beta}$ , $^1J_{C\alpha N}$ , $^2J_{C\alpha N}$ , $^3J_{HNH\alpha}$ , $^3J_{HNC\beta}$ , $^3J_{H\alpha C}$ and $^3J_{HNC}$ scalar couplings, <sup>[10-12]</sup> side-chain $^3J_{CC\gamma}$ and $^3J_{NC\gamma}$ scalar couplings, <sup>[13]</sup> backbone N-HN, C $\alpha$ -H $\alpha$ , C $\alpha$ -C, C-N and C-HN RDCs, <sup>[14-15]</sup> backbone amide S <sup>2</sup> order parameters, <sup>[16]</sup> side-chain methyl axis S <sup>2</sup> order parameters <sup>[17]</sup> |                                  |
| SPR17                       | Backbone C $\alpha$ , C $\beta$ , C, N, H $\alpha$ and HN chemical shifts <sup>[18]</sup>                                                                                                                                                                                                                                                                                                                                                                                                                                                                                                                                          |                                  |
| <b>Disordered Protein</b>   |                                                                                                                                                                                                                                                                                                                                                                                                                                                                                                                                                                                                                                    |                                  |
| HEWL19                      | Backbone C $\alpha$ , N, H $\alpha$ and HN chemical shifts <sup>[2]</sup>                                                                                                                                                                                                                                                                                                                                                                                                                                                                                                                                                          |                                  |
| RS                          | Backbone C $\alpha$ and C chemical shifts, backbone $^1J_{C\alpha C\beta}$ , $^1J_{H\alpha C\alpha}$ and $^3J_{HNH\alpha}$ scalar couplings, side-chain $^3J_{CC\gamma}$ and $^3J_{NC\gamma}$ scalar couplings, backbone N-HN, C $\alpha$ -H $\alpha$ and C $\alpha$ -C RDCs <sup>[19]</sup> , small-angle X-ray scattering curve, Rg <sup>[20]</sup>                                                                                                                                                                                                                                                                              |                                  |
| HIVRev                      | Backbone C $\alpha$ , C $\beta$ , C, N, H $\alpha$ and HN chemical shifts <sup>[21]</sup>                                                                                                                                                                                                                                                                                                                                                                                                                                                                                                                                          |                                  |
| A $\beta$ 40                | Backbone C $\alpha$ , C $\beta$ , N, H $\alpha$ and HN chemical shifts, <sup>[22]</sup> backbone $^1J_{H\alpha C\alpha}$ , $^1J_{C\alpha N}$ , $^2J_{C\alpha N}$ , $^3J_{HNH\alpha}$ , $^3J_{H\alpha C}$ and $^3J_{CC}$ scalar couplings, <sup>[23]</sup> backbone N-HN RDC, <sup>[24]</sup> Rg <sup>[25]</sup>                                                                                                                                                                                                                                                                                                                    |                                  |
| A $\beta$ 42                | Backbone C $\alpha$ , C $\beta$ , N, H $\alpha$ and HN chemical shifts, <sup>[26]</sup> backbone $^3J_{HNH\alpha}$ scalar couplings, <sup>[23]</sup> backbone N-HN RDCs <sup>[24]</sup>                                                                                                                                                                                                                                                                                                                                                                                                                                            |                                  |
| ACTR                        | Backbone C $\alpha$ , C $\beta$ , C, N, H $\alpha$ and HN chemical shifts, <sup>[27]</sup> backbone N-HN RDCs, <sup>[28]</sup> Rg <sup>[29]</sup>                                                                                                                                                                                                                                                                                                                                                                                                                                                                                  |                                  |
| IA3                         | Backbone C $\alpha$ , C, N, H $\alpha$ and HN chemical shifts <sup>[30]</sup>                                                                                                                                                                                                                                                                                                                                                                                                                                                                                                                                                      |                                  |
| p53N                        | Backbone C $\alpha$ , C $\beta$ , C, N and HN chemical shifts <sup>[31]</sup>                                                                                                                                                                                                                                                                                                                                                                                                                                                                                                                                                      |                                  |
| tauF4                       | Backbone C $\alpha$ , C $\beta$ , N and HN chemical shifts <sup>[32]</sup>                                                                                                                                                                                                                                                                                                                                                                                                                                                                                                                                                         |                                  |
| <b>Fast-Folding Protein</b> |                                                                                                                                                                                                                                                                                                                                                                                                                                                                                                                                                                                                                                    |                                  |
| CLN025                      | Temperature-dependent hairpin fraction <sup>[33]</sup>                                                                                                                                                                                                                                                                                                                                                                                                                                                                                                                                                                             |                                  |
| AAQAA3                      | Temperature-dependent helical fraction <sup>[34]</sup>                                                                                                                                                                                                                                                                                                                                                                                                                                                                                                                                                                             |                                  |
| GB1                         | Temperature-dependent native-state stability <sup>[35]</sup>                                                                                                                                                                                                                                                                                                                                                                                                                                                                                                                                                                       |                                  |

**Table S3.** FF score of six ff03-series force field for 15 tested system.

| <b>Force Field</b>        | <b><i>ff03/</i><br/><i>TIP3P</i></b> | <b><i>ff03*/</i><br/><i>TIP3P</i></b> | <b><i>ff03w/</i><br/><i>TIP4P2005</i></b> | <b><i>ff03ws/</i><br/><i>TIP4P2005</i></b> | <b><i>ff03CMAP/</i><br/><i>TIP4PEw</i></b> | <b><i>ff03CMAP/</i><br/><i>TIP4PD</i></b> |
|---------------------------|--------------------------------------|---------------------------------------|-------------------------------------------|--------------------------------------------|--------------------------------------------|-------------------------------------------|
| <b>Peptide</b>            |                                      |                                       |                                           |                                            |                                            |                                           |
| Ala5                      | 1.950                                | 1.468                                 | 1.564                                     | 1.599                                      | 1.178                                      | 1.155                                     |
| <b>Disordered Protein</b> |                                      |                                       |                                           |                                            |                                            |                                           |
| HEWL19                    | 1.290                                | 1.039                                 | 1.089                                     | 1.117                                      | 1.125                                      | 1.092                                     |
| RS                        | 4.453                                | 1.657                                 | 1.600                                     | 1.454                                      | 1.140                                      | 1.105                                     |
| HIVRev                    | 1.761                                | 1.763                                 | 1.677                                     | 1.208                                      | 1.244                                      | 1.295                                     |
| A $\beta$ 40              | 2.016                                | 1.756                                 | 1.872                                     | 1.758                                      | 1.124                                      | 1.001                                     |
| A $\beta$ 42              | 2.106                                | 1.866                                 | 1.972                                     | 1.858                                      | 1.184                                      | 1.021                                     |
| ACTR                      | 1.618                                | 1.474                                 | 1.354                                     | 1.172                                      | 1.245                                      | 1.033                                     |
| IA3                       | 2.111                                | 1.810                                 | 1.923                                     | 1.677                                      | 1.404                                      | 1.000                                     |
| p53N                      | 1.668                                | 1.441                                 | 1.537                                     | 1.351                                      | 1.133                                      | 1.019                                     |
| tauF4                     | 1.587                                | 1.590                                 | 1.384                                     | 1.301                                      | 1.226                                      | 1.000                                     |
| <b>Folded Protein</b>     |                                      |                                       |                                           |                                            |                                            |                                           |
| GB3                       | 1.185                                | 1.212                                 | 1.246                                     | 1.209                                      | 1.001                                      | 1.099                                     |
| BPTI                      | 1.078                                | 1.241                                 | 1.088                                     | 1.171                                      | 1.173                                      | 1.205                                     |
| CspTm                     | 1.376                                | 1.674                                 | 1.718                                     | 1.663                                      | 1.000                                      | 1.123                                     |
| ubiquitin                 | 1.231                                | 1.506                                 | 1.249                                     | 1.769                                      | 1.003                                      | 1.509                                     |
| SPR17                     | 1.026                                | 1.041                                 | 1.052                                     | 1.219                                      | 1.019                                      | 1.220                                     |

**Table S4.** RMSD of secondary chemical shifts, J-coupling constants,  $S^2$  parameter and FF score of **GB3** for six ff03-series force fields. Chemical shifts are in ppm and the scores are unitless, J-coupling constants are in Hz, and the scores and  $S^2$  parameters are unitless.

|                           | <i>ff03/<br/>TIP3P</i> | <i>ff03*/<br/>TIP3P</i> | <i>ff03w/<br/>TIP4P2005</i> | <i>ff03ws/<br/>TIP4P2005</i> | <i>ff03CMAP/<br/>TIP4PEw</i> | <i>ff03CMAP/<br/>TIP4PD</i> |
|---------------------------|------------------------|-------------------------|-----------------------------|------------------------------|------------------------------|-----------------------------|
| C $\alpha$                | 0.599                  | 0.628                   | 0.591                       | 0.596                        | 0.529                        | 0.684                       |
| C $\beta$                 | 0.713                  | 0.725                   | 0.799                       | 0.767                        | 0.639                        | 0.630                       |
| N                         | 2.057                  | 2.058                   | 2.011                       | 2.075                        | 1.665                        | 1.668                       |
| HA                        | 0.149                  | 0.166                   | 0.176                       | 0.154                        | 0.112                        | 0.147                       |
| HN                        | 0.301                  | 0.302                   | 0.330                       | 0.305                        | 0.267                        | 0.296                       |
| $^3J_{\text{HNNH}\alpha}$ | 1.258                  | 1.246                   | 1.341                       | 1.306                        | 0.886                        | 1.012                       |
| $^3J_{\text{HNC}}$        | 0.601                  | 0.601                   | 0.633                       | 0.605                        | 0.473                        | 0.500                       |
| $^3J_{\text{HNC}\beta}$   | 0.419                  | 0.437                   | 0.477                       | 0.465                        | 0.374                        | 0.430                       |
| $S^2_{\text{NH}}$         | 0.317                  | 0.324                   | 0.314                       | 0.311                        | 0.290                        | 0.301                       |
| CS <sub>score</sub>       | 1.192                  | 1.237                   | 1.281                       | 1.222                        | 1.003                        | 1.144                       |
| Backbone $^3J$            | 1.270                  | 1.282                   | 1.376                       | 1.332                        | 1.000                        | 1.116                       |
| Backbone $S^2$            | 1.092                  | 1.117                   | 1.083                       | 1.072                        | 1.000                        | 1.038                       |
| <b>FF<sub>score</sub></b> | <b>1.185</b>           | <b>1.212</b>            | <b>1.246</b>                | <b>1.209</b>                 | <b>1.001</b>                 | <b>1.099</b>                |

**Table S5.** RMSD of secondary chemical shifts, J-coupling constants and FF score of **BPTI** for six ff03-series force fields. Chemical shifts are in ppm and the scores are unitless, J-coupling constants are in Hz, and the scores are unitless.

|                                | <i>ff03/<br/>TIP3P</i> | <i>ff03*/<br/>TIP3P</i> | <i>ff03w/<br/>TIP4P2005</i> | <i>ff03ws/<br/>TIP4P2005</i> | <i>ff03CMAP/<br/>TIP4PEw</i> | <i>ff03CMAP/<br/>TIP4PD</i> |
|--------------------------------|------------------------|-------------------------|-----------------------------|------------------------------|------------------------------|-----------------------------|
| C $\alpha$                     | 0.872                  | 1.249                   | 0.909                       | 1.251                        | 1.430                        | 1.438                       |
| C $\beta$                      | 1.770                  | 1.892                   | 1.723                       | 1.818                        | 1.683                        | 1.839                       |
| C                              | 0.784                  | 1.044                   | 0.795                       | 0.854                        | 0.910                        | 1.114                       |
| N                              | 2.171                  | 3.022                   | 2.454                       | 3.192                        | 3.213                        | 3.224                       |
| HA                             | 0.250                  | 0.256                   | 0.232                       | 0.229                        | 0.243                        | 0.237                       |
| HN                             | 0.417                  | 0.615                   | 0.467                       | 0.590                        | 0.653                        | 0.669                       |
| $^3J_{\text{HNNH}\alpha}$      | 1.639                  | 2.044                   | 1.665                       | 1.822                        | 1.500                        | 1.542                       |
| $^3J_{\text{H}\alpha\text{C}}$ | 1.671                  | 1.539                   | 1.641                       | 1.466                        | 1.560                        | 1.572                       |
| $^3J_{\text{HNC}}$             | 1.161                  | 1.217                   | 1.168                       | 1.093                        | 1.053                        | 1.069                       |
| $^3J_{\text{HNC}\beta}$        | 1.458                  | 1.353                   | 1.392                       | 1.372                        | 1.274                        | 1.221                       |
| CS <sub>score</sub>            | 1.024                  | 1.312                   | 1.057                       | 1.248                        | 1.318                        | 1.381                       |
| Backbone $^3J$                 | 1.132                  | 1.169                   | 1.120                       | 1.094                        | 1.027                        | 1.029                       |
| FF <sub>score</sub>            | 1.078                  | 1.241                   | 1.088                       | 1.171                        | 1.173                        | 1.205                       |

**Table S6.** RMSD of secondary chemical shifts and FF score of **CspTm** for six ff03-series force fields. Chemical shifts are in ppm and the scores are unitless.

|                           | <i>ff03/<br/>TIP3P</i> | <i>ff03*/<br/>TIP3P</i> | <i>ff03w/<br/>TIP4P2005</i> | <i>ff03ws/<br/>TIP4P2005</i> | <i>ff03CMAP/<br/>TIP4PEw</i> | <i>ff03CMAP/<br/>TIP4PD</i> |
|---------------------------|------------------------|-------------------------|-----------------------------|------------------------------|------------------------------|-----------------------------|
| C $\alpha$                | 1.012                  | 1.156                   | 1.007                       | 1.134                        | 0.836                        | 0.859                       |
| C $\beta$                 | 1.208                  | 1.387                   | 1.298                       | 1.266                        | 0.558                        | 0.758                       |
| C                         | 0.587                  | 0.927                   | 1.150                       | 0.899                        | 0.533                        | 0.659                       |
| N                         | 2.162                  | 2.811                   | 3.297                       | 2.904                        | 1.826                        | 2.035                       |
| HA                        | 0.296                  | 0.296                   | 0.299                       | 0.301                        | 0.248                        | 0.249                       |
| HN                        | 0.391                  | 0.475                   | 0.447                       | 0.518                        | 0.279                        | 0.279                       |
| CS <sub>score</sub>       | 1.376                  | 1.674                   | 1.718                       | 1.663                        | 1.000                        | 1.123                       |
| <b>FF<sub>score</sub></b> | <b>1.376</b>           | <b>1.674</b>            | <b>1.718</b>                | <b>1.663</b>                 | <b>1.000</b>                 | <b>1.123</b>                |

**Table S7.** RMSD of secondary chemical shifts, J-coupling constants, RDC,  $S^2$  parameter and FF score of **ubiquitin** for six ff03-series force fields. Chemical shifts are in ppm, J-coupling constants and RDC are in Hz, and the scores and  $S^2$  parameters are unitless.

|                                      | <i>ff03/<br/>TIP3P</i> | <i>ff03*/<br/>TIP3P</i> | <i>ff03w/<br/>TIP4P2005</i> | <i>ff03ws/<br/>TIP4P2005</i> | <i>ff03CMAP/<br/>TIP4PEw</i> | <i>ff03CMAP/<br/>TIP4PD</i> |
|--------------------------------------|------------------------|-------------------------|-----------------------------|------------------------------|------------------------------|-----------------------------|
| C $\alpha$                           | 0.481                  | 0.716                   | 0.507                       | 0.723                        | 0.485                        | 0.575                       |
| C $\beta$                            | 0.816                  | 0.885                   | 0.825                       | 1.069                        | 0.770                        | 0.860                       |
| C                                    | 0.607                  | 0.702                   | 0.611                       | 0.789                        | 0.609                        | 0.650                       |
| N                                    | 2.050                  | 2.450                   | 2.188                       | 2.625                        | 2.142                        | 2.573                       |
| HA                                   | 0.145                  | 0.185                   | 0.141                       | 0.234                        | 0.106                        | 0.165                       |
| HN                                   | 0.329                  | 0.349                   | 0.326                       | 0.407                        | 0.298                        | 0.293                       |
| $^3J_{\text{HNH}\alpha}$             | 1.341                  | 1.487                   | 1.484                       | 1.597                        | 1.196                        | 1.319                       |
| $^3J_{\text{H}\alpha\text{C}}$       | 0.684                  | 0.725                   | 0.623                       | 0.986                        | 0.410                        | 0.609                       |
| $^3J_{\text{HN}\text{C}\beta}$       | 0.643                  | 0.734                   | 0.671                       | 0.701                        | 0.633                        | 0.612                       |
| $^3J_{\text{HNC}}$                   | 0.681                  | 0.734                   | 0.701                       | 0.852                        | 0.564                        | 0.662                       |
| $^1J_{\text{C}\alpha\text{N}}$       | 0.465                  | 0.567                   | 0.494                       | 0.588                        | 0.415                        | 0.469                       |
| $^1J_{\text{H}\alpha\text{C}\alpha}$ | 2.669                  | 2.717                   | 2.628                       | 3.030                        | 2.225                        | 2.476                       |
| $^1J_{\text{C}\alpha\text{C}\beta}$  | 0.984                  | 1.056                   | 0.977                       | 1.229                        | 0.856                        | 0.966                       |
| $^2J_{\text{C}\alpha\text{N}}$       | 0.464                  | 0.555                   | 0.437                       | 0.682                        | 0.361                        | 0.477                       |
| $^2J_{\text{C}\text{C}\gamma}$       | 0.650                  | 0.973                   | 0.717                       | 0.936                        | 0.419                        | 0.775                       |
| $^3J_{\text{N}\text{C}\gamma}$       | 0.490                  | 0.592                   | 0.501                       | 0.557                        | 0.428                        | 0.496                       |
| $S^2_{\text{NH}}$                    | 0.074                  | 0.104                   | 0.081                       | 0.149                        | 0.069                        | 0.154                       |
| $S^2_{\text{axis}}$                  | 0.279                  | 0.260                   | 0.247                       | 0.289                        | 0.174                        | 0.279                       |
| RDC                                  | 0.174                  | 0.249                   | 0.187                       | 0.325                        | 0.166                        | 0.222                       |
| CS <sub>score</sub>                  | 1.092                  | 1.321                   | 1.107                       | 1.512                        | 1.012                        | 1.200                       |
| Backbone $^3J$                       | 1.225                  | 1.359                   | 1.228                       | 1.562                        | 1.004                        | 1.182                       |
| Sidechain $^3J$                      | 1.348                  | 1.853                   | 1.440                       | 1.768                        | 1.000                        | 1.504                       |
| Backbone $S^2$                       | 1.070                  | 1.510                   | 1.175                       | 2.156                        | 1.000                        | 2.226                       |
| Sidechain $S^2$                      | 1.603                  | 1.493                   | 1.418                       | 1.657                        | 1.000                        | 1.603                       |
| Backbone RDC                         | 1.048                  | 1.500                   | 1.127                       | 1.958                        | 1.000                        | 1.337                       |
| <b>FF<sub>score</sub></b>            | <b>1.231</b>           | <b>1.506</b>            | <b>1.249</b>                | <b>1.769</b>                 | <b>1.003</b>                 | <b>1.509</b>                |

**Table S8.** RMSD of secondary chemical shifts and FF score of **SPR17** for six ff03-series force fields. Chemical shifts are in ppm and the scores are unitless.

|                           | <i>ff03/<br/>TIP3P</i> | <i>ff03*/<br/>TIP3P</i> | <i>ff03w/<br/>TIP4P2005</i> | <i>ff03ws/<br/>TIP4P2005</i> | <i>ff03CMAP/<br/>TIP4PEw</i> | <i>ff03CMAP/<br/>TIP4PD</i> |
|---------------------------|------------------------|-------------------------|-----------------------------|------------------------------|------------------------------|-----------------------------|
| C $\alpha$                | 0.900                  | 0.936                   | 0.970                       | 1.209                        | 0.906                        | 1.220                       |
| C $\beta$                 | 0.702                  | 0.754                   | 0.733                       | 0.887                        | 0.716                        | 0.814                       |
| C                         | 0.985                  | 0.984                   | 0.952                       | 1.253                        | 0.987                        | 1.231                       |
| N                         | 1.852                  | 1.858                   | 1.774                       | 2.026                        | 1.858                        | 2.306                       |
| HA                        | 0.209                  | 0.206                   | 0.225                       | 0.227                        | 0.201                        | 0.217                       |
| HN                        | 0.442                  | 0.438                   | 0.457                       | 0.477                        | 0.426                        | 0.484                       |
| CS <sub>score</sub>       | 1.026                  | 1.041                   | 1.052                       | 1.219                        | 1.019                        | 1.220                       |
| <b>FF<sub>score</sub></b> | <b>1.026</b>           | <b>1.041</b>            | <b>1.052</b>                | <b>1.219</b>                 | <b>1.019</b>                 | <b>1.220</b>                |

**Table S9.** RMSD of secondary chemical shifts and FF score of **HEWL19** for six ff03-series force fields. Chemical shifts are in ppm and the scores are unitless.

|                           | <i>ff03/<br/>TIP3P</i> | <i>ff03*/<br/>TIP3P</i> | <i>ff03w/<br/>TIP4P2005</i> | <i>ff03ws/<br/>TIP4P2005</i> | <i>ff03CMAP/<br/>TIP4PEw</i> | <i>ff03CMAP/<br/>TIP4PD</i> |
|---------------------------|------------------------|-------------------------|-----------------------------|------------------------------|------------------------------|-----------------------------|
| C $\alpha$                | 1.516                  | 1.215                   | 1.184                       | 1.175                        | 1.189                        | 1.158                       |
| N                         | 1.754                  | 1.393                   | 1.481                       | 1.259                        | 1.394                        | 1.267                       |
| H $\alpha$                | 0.206                  | 0.181                   | 0.191                       | 0.199                        | 0.187                        | 0.194                       |
| HN                        | 0.241                  | 0.182                   | 0.201                       | 0.247                        | 0.243                        | 0.235                       |
| CS <sub>score</sub>       | 1.290                  | 1.039                   | 1.089                       | 1.117                        | 1.125                        | 1.092                       |
| <b>FF<sub>score</sub></b> | <b>1.290</b>           | <b>1.039</b>            | <b>1.089</b>                | <b>1.117</b>                 | <b>1.125</b>                 | <b>1.092</b>                |



**Table S10.** RMSD of secondary chemical shifts, J-coupling constants, RDC and FF score of **RS** for six ff03-series force fields. Chemical shifts are in ppm, J-coupling constants and RDC are in Hz and the scores are unitless.

|                                      | <i>ff03/<br/>TIP3P</i> | <i>ff03*/<br/>TIP3P</i> | <i>ff03w/<br/>TIP4P2005</i> | <i>ff03ws/<br/>TIP4P2005</i> | <i>ff03CMAP/<br/>TIP4PEw</i> | <i>ff03CMAP/<br/>TIP4PD</i> |
|--------------------------------------|------------------------|-------------------------|-----------------------------|------------------------------|------------------------------|-----------------------------|
| C $\alpha$                           | 1.813                  | 0.502                   | 0.484                       | 0.385                        | 0.239                        | 0.193                       |
| C                                    | 1.199                  | 0.333                   | 0.296                       | 0.307                        | 0.354                        | 0.373                       |
| $^3J_{\text{HNH}\alpha}$             | 1.777                  | 0.987                   | 0.974                       | 0.981                        | 0.407                        | 0.491                       |
| $^1J_{\text{C}\alpha\text{C}\beta}$  | 1.625                  | 1.407                   | 1.420                       | 1.438                        | 1.084                        | 1.195                       |
| $^1J_{\text{H}\alpha\text{C}\alpha}$ | 4.190                  | 2.462                   | 2.511                       | 2.395                        | 1.774                        | 1.824                       |
| $^3J_{\text{CC}\gamma}$              | 0.302                  | 0.314                   | 0.271                       | 0.278                        | 0.330                        | 0.311                       |
| $^3J_{\text{NC}\gamma}$              | 0.386                  | 0.254                   | 0.272                       | 0.233                        | 0.230                        | 0.217                       |
| RDC                                  | 1.425                  | 0.908                   | 0.939                       | 0.841                        | 0.788                        | 0.716                       |
| CS <sub>score</sub>                  | 6.720                  | 1.862                   | 1.753                       | 1.514                        | 1.217                        | 1.128                       |
| NMR <sub>score</sub>                 | 2.186                  | 1.451                   | 1.448                       | 1.394                        | 1.063                        | 1.081                       |
| <b>FF<sub>score</sub></b>            | <b>4.453</b>           | <b>1.657</b>            | <b>1.600</b>                | <b>1.454</b>                 | <b>1.140</b>                 | <b>1.105</b>                |

**Table S11.** RMSD of secondary chemical shifts and FF score of **HIVRev** for six ff03-series force fields. Chemical shifts are in ppm and the scores are unitless.

|                           | <i>ff03/<br/>TIP3P</i> | <i>ff03*/<br/>TIP3P</i> | <i>ff03w/<br/>TIP4P2005</i> | <i>ff03ws/<br/>TIP4P2005</i> | <i>ff03CMAP/<br/>TIP4PEw</i> | <i>ff03CMAP/<br/>TIP4PD</i> |
|---------------------------|------------------------|-------------------------|-----------------------------|------------------------------|------------------------------|-----------------------------|
| C $\alpha$                | 1.192                  | 0.909                   | 1.043                       | 0.401                        | 0.522                        | 0.600                       |
| C $\beta$                 | 0.337                  | 0.721                   | 0.433                       | 0.609                        | 0.491                        | 0.545                       |
| C                         | 0.596                  | 1.200                   | 0.636                       | 0.693                        | 0.801                        | 0.879                       |
| N                         | 2.212                  | 1.274                   | 1.957                       | 1.193                        | 1.283                        | 1.024                       |
| H $\alpha$                | 0.112                  | 0.090                   | 0.100                       | 0.062                        | 0.061                        | 0.073                       |
| HN                        | 0.345                  | 0.309                   | 0.333                       | 0.235                        | 0.237                        | 0.214                       |
| CS <sub>score</sub>       | 1.761                  | 1.763                   | 1.677                       | 1.208                        | 1.244                        | 1.295                       |
| <b>FF<sub>score</sub></b> | <b>1.761</b>           | <b>1.763</b>            | <b>1.677</b>                | <b>1.208</b>                 | <b>1.244</b>                 | <b>1.295</b>                |

**Table S12.** RMSD of secondary chemical shifts, J-coupling constants, RDC and FF score of **A $\beta$ 40** for seven ff03-series force fields. Chemical shifts are in ppm, J-coupling constants and RDC are in Hz and the scores are unitless.

|                           | <i>ff03/<br/>TIP3P</i> | <i>ff03*/<br/>TIP3P</i> | <i>ff03w/<br/>TIP4P2005</i> | <i>ff03ws/<br/>TIP4P2005</i> | <i>ff03CMAP/<br/>TIP4PEw</i> | <i>ff03CMAP/<br/>TIP4PD</i> | <i>ff03/<br/>TIP4PD</i> |
|---------------------------|------------------------|-------------------------|-----------------------------|------------------------------|------------------------------|-----------------------------|-------------------------|
| C $\alpha$                | 1.093                  | 0.943                   | 1.026                       | 0.940                        | 0.445                        | 0.426                       | 0.905                   |
| C $\beta$                 | 0.648                  | 0.512                   | 0.547                       | 0.621                        | 0.422                        | 0.398                       | 0.657                   |
| N                         | 3.324                  | 2.873                   | 2.962                       | 2.580                        | 1.539                        | 1.291                       | 2.751                   |
| H $\alpha$                | 0.125                  | 0.101                   | 0.122                       | 0.108                        | 0.087                        | 0.087                       | 0.105                   |
| HN                        | 0.404                  | 0.365                   | 0.382                       | 0.375                        | 0.284                        | 0.259                       | 0.352                   |
| $^3J_{\text{HNH}\alpha}$  | 1.320                  | 1.261                   | 1.252                       | 0.983                        | 0.563                        | 0.513                       | 1.114                   |
| $^3J_{\text{HaC}}$        | 0.949                  | 0.987                   | 0.978                       | 1.017                        | 0.634                        | 0.407                       | 1.003                   |
| $^3J_{\text{CC}}$         | 0.391                  | 0.322                   | 0.375                       | 0.375                        | 0.161                        | 0.135                       | 0.374                   |
| $^1J_{\text{CaN}}$        | 0.585                  | 0.469                   | 0.524                       | 0.559                        | 0.474                        | 0.431                       | 0.548                   |
| $^1J_{\text{HaCa}}$       | 2.835                  | 2.545                   | 2.607                       | 2.460                        | 1.550                        | 1.383                       | 2.311                   |
| $^2J_{\text{CaN}}$        | 1.254                  | 0.936                   | 1.090                       | 0.840                        | 0.603                        | 0.561                       | 0.972                   |
| RDC                       | 0.790                  | 0.783                   | 0.722                       | 0.721                        | 0.757                        | 0.719                       | 0.728                   |
| CS <sub>score</sub>       | 1.955                  | 1.660                   | 1.791                       | 1.692                        | 1.078                        | 1.002                       | 1.696                   |
| NMR <sub>score</sub>      | 2.077                  | 1.851                   | 1.953                       | 1.825                        | 1.171                        | 1.000                       | 1.870                   |
| <b>FF<sub>score</sub></b> | <b>2.016</b>           | <b>1.756</b>            | <b>1.872</b>                | <b>1.758</b>                 | <b>1.124</b>                 | <b>1.001</b>                | <b>1.783</b>            |

**Table S13.** RMSD of secondary chemical shifts, J-coupling constants, RDC and FF score of **A $\beta$ 42** for six ff03-series force fields. Chemical shifts are in ppm, J-coupling constants and RDC are in Hz and the scores are unitless.

|                           | <i>ff03/<br/>TIP3P</i> | <i>ff03*/<br/>TIP3P</i> | <i>ff03w/<br/>TIP4P2005</i> | <i>ff03ws/<br/>TIP4P2005</i> | <i>ff03CMAP/<br/>TIP4PEw</i> | <i>ff03CMAP/<br/>TIP4PD</i> |
|---------------------------|------------------------|-------------------------|-----------------------------|------------------------------|------------------------------|-----------------------------|
| C $\alpha$                | 1.793                  | 1.398                   | 1.554                       | 1.421                        | 0.747                        | 0.383                       |
| C $\beta$                 | 0.622                  | 0.674                   | 0.649                       | 0.658                        | 0.427                        | 0.378                       |
| N                         | 3.278                  | 2.931                   | 3.150                       | 3.029                        | 1.965                        | 1.362                       |
| H $\alpha$                | 0.190                  | 0.198                   | 0.194                       | 0.200                        | 0.199                        | 0.207                       |
| HN                        | 0.287                  | 0.293                   | 0.297                       | 0.288                        | 0.229                        | 0.228                       |
| $^3J_{\text{HNH}\alpha}$  | 1.748                  | 1.446                   | 1.595                       | 1.419                        | 0.610                        | 0.586                       |
| RDC                       | 0.729                  | 0.720                   | 0.699                       | 0.710                        | 0.743                        | 0.733                       |
| CS <sub>score</sub>       | 2.198                  | 1.982                   | 2.082                       | 1.997                        | 1.315                        | 1.018                       |
| NMR <sub>score</sub>      | 2.014                  | 1.750                   | 1.862                       | 1.719                        | 1.052                        | 1.024                       |
| <b>FF<sub>score</sub></b> | <b>2.106</b>           | <b>1.866</b>            | <b>1.972</b>                | <b>1.858</b>                 | <b>1.184</b>                 | <b>1.021</b>                |

**Table S14.** RMSD of secondary chemical shifts, RDC and FF score of **ACTR** for seven ff03-series force fields. Chemical shifts are in ppm, RDC are in Hz and the scores are unitless.

|                           | <i>ff03/<br/>TIP3P</i> | <i>ff03*/<br/>TIP3P</i> | <i>ff03w/<br/>TIP4P2005</i> | <i>ff03ws/<br/>TIP4P2005</i> | <i>ff03CMAP/<br/>TIP4PEw</i> | <i>ff03CMAP/<br/>TIP4PD</i> | <i>ff03/<br/>TIP4PD</i> |
|---------------------------|------------------------|-------------------------|-----------------------------|------------------------------|------------------------------|-----------------------------|-------------------------|
| C $\alpha$                | 1.420                  | 1.233                   | 1.066                       | 0.841                        | 0.708                        | 0.469                       | 1.049                   |
| C $\beta$                 | 0.524                  | 0.461                   | 0.470                       | 0.376                        | 0.525                        | 0.316                       | 0.449                   |
| C                         | 1.107                  | 0.901                   | 0.768                       | 0.622                        | 0.522                        | 0.531                       | 0.758                   |
| N                         | 2.323                  | 2.141                   | 1.962                       | 1.467                        | 1.566                        | 1.134                       | 2.049                   |
| HN                        | 0.268                  | 0.252                   | 0.234                       | 0.203                        | 0.201                        | 0.162                       | 0.248                   |
| RDC                       | 0.767                  | 0.742                   | 0.694                       | 0.676                        | 0.766                        | 0.719                       | 0.700                   |
| NMR <sub>score</sub>      | 1.135                  | 1.098                   | 1.027                       | 1.000                        | 1.133                        | 1.064                       | 1.036                   |
| CS <sub>score</sub>       | 2.101                  | 1.851                   | 1.681                       | 1.344                        | 1.358                        | 1.003                       | 1.689                   |
| <b>FF<sub>score</sub></b> | <b>1.618</b>           | <b>1.474</b>            | <b>1.354</b>                | <b>1.172</b>                 | <b>1.245</b>                 | <b>1.033</b>                | <b>1.362</b>            |

**Table S15.** RMSD of secondary chemical shifts and FF score of **IA3** for seven ff03-series force fields. Chemical shifts are in ppm and the scores are unitless.

|                           | <i>ff03/<br/>TIP3P</i> | <i>ff03*/<br/>TIP3P</i> | <i>ff03w/<br/>TIP4P2005</i> | <i>ff03ws/<br/>TIP4P2005</i> | <i>ff03CMAP/<br/>TIP4PEw</i> | <i>ff03CMAP/<br/>TIP4PD</i> | <i>ff03/<br/>TIP4PD</i> |
|---------------------------|------------------------|-------------------------|-----------------------------|------------------------------|------------------------------|-----------------------------|-------------------------|
| C $\alpha$                | 1.841                  | 1.505                   | 1.608                       | 1.416                        | 1.060                        | 0.658                       | 1.464                   |
| C                         | 1.269                  | 0.993                   | 1.092                       | 1.015                        | 0.740                        | 0.625                       | 0.965                   |
| N                         | 2.785                  | 2.661                   | 2.818                       | 2.471                        | 2.114                        | 1.430                       | 2.612                   |
| H $\alpha$                | 0.197                  | 0.167                   | 0.162                       | 0.128                        | 0.150                        | 0.103                       | 0.162                   |
| HN                        | 0.403                  | 0.365                   | 0.406                       | 0.353                        | 0.278                        | 0.216                       | 0.365                   |
| CS <sub>score</sub>       | 2.111                  | 1.810                   | 1.923                       | 1.677                        | 1.404                        | 1.000                       | 1.773                   |
| <b>FF<sub>score</sub></b> | <b>2.111</b>           | <b>1.810</b>            | <b>1.923</b>                | <b>1.677</b>                 | <b>1.404</b>                 | <b>1.000</b>                | <b>1.773</b>            |

**Table S16.** RMSD of secondary chemical shifts and FF score of **p53N** for six ff03-series force fields. Chemical shifts are in ppm and the scores are unitless.

|                           | <i>ff03/<br/>TIP3P</i> | <i>ff03*/<br/>TIP3P</i> | <i>ff03w/<br/>TIP4P2005</i> | <i>ff03ws/<br/>TIP4P2005</i> | <i>ff03CMAP/<br/>TIP4PEw</i> | <i>ff03CMAP/<br/>TIP4PD</i> |
|---------------------------|------------------------|-------------------------|-----------------------------|------------------------------|------------------------------|-----------------------------|
| C $\alpha$                | 1.295                  | 0.994                   | 1.081                       | 0.957                        | 0.512                        | 0.561                       |
| C $\beta$                 | 0.628                  | 0.603                   | 0.603                       | 0.554                        | 0.616                        | 0.484                       |
| C                         | 0.651                  | 0.589                   | 0.628                       | 0.551                        | 0.557                        | 0.511                       |
| N                         | 2.629                  | 2.347                   | 2.518                       | 2.048                        | 1.876                        | 1.457                       |
| HN                        | 0.364                  | 0.318                   | 0.348                       | 0.318                        | 0.257                        | 0.254                       |
| CS <sub>score</sub>       | 1.668                  | 1.441                   | 1.537                       | 1.351                        | 1.133                        | 1.019                       |
| <b>FF<sub>score</sub></b> | <b>1.668</b>           | <b>1.441</b>            | <b>1.537</b>                | <b>1.351</b>                 | <b>1.133</b>                 | <b>1.019</b>                |

**Table S17.** RMSD of secondary chemical shifts and FF score of **tauF4** for six ff03-series force fields. Chemical shifts are in ppm and the scores are unitless.

|                           | <i>ff03/<br/>TIP3P</i> | <i>ff03*/<br/>TIP3P</i> | <i>ff03w/<br/>TIP4P2005</i> | <i>ff03ws/<br/>TIP4P2005</i> | <i>ff03CMAP/<br/>TIP4PEw</i> | <i>ff03CMAP/<br/>TIP4PD</i> |
|---------------------------|------------------------|-------------------------|-----------------------------|------------------------------|------------------------------|-----------------------------|
| C $\alpha$                | 1.034                  | 0.978                   | 0.770                       | 0.779                        | 0.822                        | 0.722                       |
| C $\beta$                 | 0.685                  | 0.807                   | 0.713                       | 0.632                        | 0.556                        | 0.507                       |
| N                         | 2.966                  | 2.739                   | 2.516                       | 2.401                        | 2.023                        | 1.488                       |
| HN                        | 0.339                  | 0.339                   | 0.296                       | 0.273                        | 0.282                        | 0.216                       |
| CS <sub>score</sub>       | 1.587                  | 1.590                   | 1.384                       | 1.301                        | 1.226                        | 1.000                       |
| <b>FF<sub>score</sub></b> | <b>1.587</b>           | <b>1.590</b>            | <b>1.384</b>                | <b>1.301</b>                 | <b>1.226</b>                 | <b>1.000</b>                |



**Table S18.** Side-chain  $^3J_{CC\gamma}$  coupling constant of ubiquitin for six ff03-series force fields. J-coupling constants are in Hz.

|                | Exp. | <i>ff03/<br/>TIP3P</i> | <i>ff03*/<br/>TIP3P</i> | <i>ff03w/<br/>TIP4P2005</i> | <i>ff03ws/<br/>TIP4P2005</i> | <i>ff03CMAP/<br/>TIP4PEw</i> | <i>ff03CMAP/<br/>TIP4PD</i> |
|----------------|------|------------------------|-------------------------|-----------------------------|------------------------------|------------------------------|-----------------------------|
| I3 $\gamma$ 2  | 3.68 | 3.681                  | 3.051                   | 3.505                       | 3.036                        | 3.885                        | 1.543                       |
| V5 $\gamma$ 1  | 0.00 | 0.687                  | 0.893                   | 0.709                       | 0.751                        | 0.751                        | 0.710                       |
| V5 $\gamma$ 2  | 3.66 | 2.986                  | 2.539                   | 2.974                       | 3.553                        | 3.804                        | 3.500                       |
| T7 $\gamma$ 2  | 2.67 | 2.628                  | 3.734                   | 3.526                       | 3.003                        | 3.437                        | 3.827                       |
| T9 $\gamma$ 2  | 3.00 | 3.650                  | 3.379                   | 3.562                       | 3.519                        | 3.684                        | 3.330                       |
| T12 $\gamma$ 2 | 0.39 | 0.811                  | 0.763                   | 0.807                       | 0.916                        | 0.717                        | 0.919                       |
| I13 $\gamma$ 2 | 1.71 | 3.500                  | 3.698                   | 3.561                       | 3.250                        | 2.269                        | 2.930                       |
| T14 $\gamma$ 2 | 0.76 | 2.216                  | 2.100                   | 1.968                       | 1.772                        | 1.082                        | 1.250                       |
| V17 $\gamma$ 1 | 3.93 | 3.241                  | 3.186                   | 2.879                       | 2.976                        | 3.530                        | 2.939                       |
| V17 $\gamma$ 2 | 0.96 | 0.878                  | 0.963                   | 0.950                       | 0.643                        | 0.976                        | 1.419                       |
| T22 $\gamma$ 2 | 3.39 | 3.761                  | 3.642                   | 3.555                       | 2.781                        | 3.756                        | 3.027                       |
| I23 $\gamma$ 2 | 0.94 | 0.835                  | 0.829                   | 0.857                       | 1.298                        | 0.855                        | 1.597                       |
| V26 $\gamma$ 1 | 0.82 | 0.855                  | 0.836                   | 0.835                       | 1.504                        | 0.704                        | 0.776                       |
| V26 $\gamma$ 2 | 4.18 | 3.724                  | 3.639                   | 3.700                       | 2.789                        | 3.788                        | 3.491                       |
| I30 $\gamma$ 2 | 0.96 | 0.919                  | 2.400                   | 0.961                       | 1.968                        | 0.901                        | 0.903                       |
| I36 $\gamma$ 2 | 0.71 | 1.025                  | 2.201                   | 1.130                       | 1.825                        | 1.097                        | 0.602                       |
| I44 $\gamma$ 2 | 0.80 | 1.317                  | 1.831                   | 1.552                       | 3.147                        | 0.792                        | 0.905                       |
| T55 $\gamma$ 2 | 3.02 | 3.633                  | 3.657                   | 3.627                       | 3.264                        | 3.782                        | 3.106                       |
| I61 $\gamma$ 2 | 0.98 | 0.939                  | 0.881                   | 0.833                       | 1.339                        | 0.770                        | 0.893                       |
| V70 $\gamma$ 2 | 2.43 | 2.278                  | 0.809                   | 1.617                       | 1.657                        | 2.677                        | 1.344                       |
| <b>RMSD</b>    | -    | <b>0.650</b>           | <b>0.973</b>            | <b>0.717</b>                | <b>0.936</b>                 | <b>0.419</b>                 | <b>0.775</b>                |

**Table S19.** Side-chain  $^3J_{\text{NC}\gamma}$  coupling constant of ubiquitin for six ff03-series force fields. J-coupling constants are in Hz.

|                | Exp. | <i>ff03/</i><br><i>TIP3P</i> | <i>ff03*/</i><br><i>TIP3P</i> | <i>ff03w/</i><br><i>TIP4P2005</i> | <i>ff03ws/</i><br><i>TIP4P2005</i> | <i>ff03CMAP/</i><br><i>TIP4PEw</i> | <i>ff03CMAP/</i><br><i>TIP4PD</i> |
|----------------|------|------------------------------|-------------------------------|-----------------------------------|------------------------------------|------------------------------------|-----------------------------------|
| I3 $\gamma$ 2  | 0.39 | 0.399                        | 0.443                         | 0.414                             | 0.435                              | 0.392                              | 0.962                             |
| V5 $\gamma$ 1  | 1.83 | 1.782                        | 1.525                         | 1.772                             | 2.091                              | 2.224                              | 2.062                             |
| V5 $\gamma$ 2  | 0.46 | 0.987                        | 1.102                         | 0.980                             | 0.657                              | 0.515                              | 0.703                             |
| T7 $\gamma$ 2  | 1.02 | 1.089                        | 0.545                         | 0.620                             | 0.682                              | 0.718                              | 0.478                             |
| T9 $\gamma$ 2  | 0.81 | 0.502                        | 0.643                         | 0.548                             | 0.536                              | 0.486                              | 0.668                             |
| T12 $\gamma$ 2 | 1.61 | 2.120                        | 2.159                         | 2.069                             | 2.043                              | 2.197                              | 2.051                             |
| I13 $\gamma$ 2 | 1.44 | 0.611                        | 0.477                         | 0.568                             | 0.726                              | 1.329                              | 0.947                             |
| T14 $\gamma$ 2 | 1.50 | 0.798                        | 1.008                         | 0.992                             | 0.774                              | 1.690                              | 1.776                             |
| V17 $\gamma$ 1 | 0.25 | 0.579                        | 0.624                         | 0.620                             | 0.452                              | 0.630                              | 0.881                             |
| V17 $\gamma$ 2 | 0.68 | 0.674                        | 0.662                         | 0.834                             | 0.938                              | 0.469                              | 0.559                             |
| T22 $\gamma$ 2 | 0.75 | 0.487                        | 0.553                         | 0.523                             | 0.621                              | 0.540                              | 0.475                             |
| I23 $\gamma$ 2 | 2.11 | 1.343                        | 0.836                         | 1.048                             | 1.179                              | 0.747                              | 1.159                             |
| V26 $\gamma$ 1 | 2.16 | 2.156                        | 2.132                         | 2.149                             | 1.645                              | 2.223                              | 2.039                             |
| V26 $\gamma$ 2 | 0.62 | 0.495                        | 0.562                         | 0.523                             | 0.632                              | 0.561                              | 0.666                             |
| I30 $\gamma$ 2 | 2.10 | 2.223                        | 1.062                         | 2.190                             | 0.891                              | 2.232                              | 2.227                             |
| I36 $\gamma$ 2 | 2.08 | 0.657                        | 0.752                         | 0.728                             | 1.189                              | 1.475                              | 0.723                             |
| I44 $\gamma$ 2 | 1.62 | 1.887                        | 1.403                         | 1.745                             | 0.729                              | 2.169                              | 2.128                             |
| T55 $\gamma$ 2 | 0.82 | 0.541                        | 0.537                         | 0.548                             | 0.741                              | 0.474                              | 0.535                             |
| I61 $\gamma$ 2 | 2.15 | 2.140                        | 2.051                         | 2.207                             | 1.545                              | 2.245                              | 1.951                             |
| V70 $\gamma$ 2 | 0.50 | 0.556                        | 0.556                         | 0.543                             | 0.609                              | 0.510                              | 0.568                             |
| <b>RMSD</b>    | -    | <b>0.490</b>                 | <b>0.592</b>                  | <b>0.501</b>                      | <b>0.557</b>                       | <b>0.428</b>                       | <b>0.496</b>                      |

**Table S20.** Side-chain methyl axis order parameters of ubiquitin for six ff03-series force fields. Order parameters are in unitless.

|                | Exp. | <i>ff03/</i><br><i>TIP3P</i> | <i>ff03*/</i><br><i>TIP3P</i> | <i>ff03w/</i><br><i>TIP4P2005</i> | <i>ff03ws/</i><br><i>TIP4P2005</i> | <i>ff03CMAP/</i><br><i>TIP4PEw</i> | <i>ff03CMAP/</i><br><i>TIP4PD</i> |
|----------------|------|------------------------------|-------------------------------|-----------------------------------|------------------------------------|------------------------------------|-----------------------------------|
| I3 $\gamma$    | 0.98 | 0.359                        | 0.742                         | 0.820                             | 0.761                              | 0.916                              | 0.359                             |
| I3 $\delta$    | 0.75 | 0.345                        | 0.532                         | 0.632                             | 0.631                              | 0.616                              | 0.345                             |
| V5 $\gamma$ 1  | 0.91 | 0.676                        | 0.446                         | 0.629                             | 0.748                              | 0.852                              | 0.676                             |
| V5 $\gamma$ 2  | 0.88 | 0.695                        | 0.443                         | 0.647                             | 0.742                              | 0.844                              | 0.695                             |
| T7 $\gamma$    | 0.75 | 0.767                        | 0.751                         | 0.652                             | 0.449                              | 0.602                              | 0.767                             |
| L8 $\delta$ 1  | 0.27 | 0.196                        | 0.331                         | 0.253                             | 0.340                              | 0.292                              | 0.196                             |
| L8 $\delta$ 2  | 0.21 | 0.176                        | 0.347                         | 0.225                             | 0.361                              | 0.217                              | 0.176                             |
| T9 $\gamma$    | 0.64 | 0.452                        | 0.487                         | 0.564                             | 0.511                              | 0.531                              | 0.452                             |
| T12 $\gamma$   | 0.93 | 0.680                        | 0.774                         | 0.660                             | 0.617                              | 0.816                              | 0.680                             |
| I13 $\gamma$   | 0.56 | 0.587                        | 0.762                         | 0.702                             | 0.592                              | 0.387                              | 0.587                             |
| I13 $\delta$   | 0.55 | 0.546                        | 0.634                         | 0.648                             | 0.548                              | 0.345                              | 0.546                             |
| T14 $\gamma$   | 0.78 | 0.401                        | 0.206                         | 0.207                             | 0.305                              | 0.426                              | 0.401                             |
| L15 $\delta$ 1 | 0.58 | 0.484                        | 0.251                         | 0.180                             | 0.447                              | 0.398                              | 0.484                             |
| L15 $\delta$ 2 | 0.62 | 0.442                        | 0.292                         | 0.181                             | 0.419                              | 0.410                              | 0.442                             |
| V17 $\gamma$ 1 | 0.89 | 0.393                        | 0.534                         | 0.364                             | 0.512                              | 0.680                              | 0.393                             |
| V17 $\gamma$ 2 | 0.89 | 0.391                        | 0.528                         | 0.393                             | 0.547                              | 0.682                              | 0.391                             |
| T22 $\gamma$   | 0.95 | 0.547                        | 0.798                         | 0.711                             | 0.533                              | 0.841                              | 0.547                             |
| I23 $\gamma$   | 0.95 | 0.595                        | 0.795                         | 0.785                             | 0.578                              | 0.756                              | 0.595                             |
| I23 $\delta$   | 0.51 | 0.547                        | 0.742                         | 0.778                             | 0.340                              | 0.802                              | 0.547                             |
| V26 $\gamma$ 1 | 0.86 | 0.676                        | 0.729                         | 0.735                             | 0.530                              | 0.867                              | 0.676                             |
| V26 $\gamma$ 2 | 0.99 | 0.675                        | 0.724                         | 0.740                             | 0.531                              | 0.870                              | 0.675                             |
| I30 $\gamma$   | 0.93 | 0.923                        | 0.664                         | 0.886                             | 0.654                              | 0.928                              | 0.923                             |
| I30 $\delta$   | 0.77 | 0.795                        | 0.585                         | 0.699                             | 0.443                              | 0.586                              | 0.795                             |
| I36 $\gamma$   | 0.83 | 0.793                        | 0.514                         | 0.601                             | 0.421                              | 0.427                              | 0.793                             |
| I36 $\delta$   | 0.58 | 0.665                        | 0.495                         | 0.540                             | 0.285                              | 0.466                              | 0.665                             |
| L43 $\delta$ 1 | 0.55 | 0.389                        | 0.372                         | 0.332                             | 0.522                              | 0.351                              | 0.389                             |
| L43 $\delta$ 2 | 0.61 | 0.333                        | 0.348                         | 0.306                             | 0.522                              | 0.335                              | 0.333                             |
| I44 $\gamma$   | 0.71 | 0.750                        | 0.446                         | 0.470                             | 0.714                              | 0.792                              | 0.750                             |
| I44 $\delta$   | 0.31 | 0.289                        | 0.336                         | 0.225                             | 0.613                              | 0.182                              | 0.289                             |
| A46 $\beta$    | 0.95 | 0.643                        | 0.619                         | 0.658                             | 0.712                              | 0.687                              | 0.643                             |
| L50 $\delta$ 1 | 0.89 | 0.252                        | 0.459                         | 0.586                             | 0.270                              | 0.718                              | 0.252                             |
| L50 $\delta$ 2 | 0.86 | 0.275                        | 0.440                         | 0.553                             | 0.289                              | 0.690                              | 0.275                             |
| T55 $\gamma$   | 0.93 | 0.606                        | 0.733                         | 0.711                             | 0.482                              | 0.824                              | 0.606                             |
| L56 $\delta$ 1 | 0.60 | 0.355                        | 0.353                         | 0.368                             | 0.492                              | 0.393                              | 0.355                             |
| L56 $\delta$ 2 | 0.62 | 0.355                        | 0.384                         | 0.377                             | 0.487                              | 0.398                              | 0.355                             |
| I61 $\gamma$   | 0.95 | 0.516                        | 0.659                         | 0.819                             | 0.341                              | 0.850                              | 0.516                             |
| I61 $\delta$   | 0.56 | 0.270                        | 0.220                         | 0.194                             | 0.199                              | 0.269                              | 0.270                             |
| L67 $\delta$ 1 | 0.30 | 0.153                        | 0.284                         | 0.316                             | 0.473                              | 0.305                              | 0.153                             |
| L67 $\delta$ 2 | 0.29 | 0.234                        | 0.259                         | 0.300                             | 0.454                              | 0.351                              | 0.234                             |
| L69 $\delta$ 2 | 0.55 | 0.844                        | 0.372                         | 0.841                             | 0.514                              | 0.784                              | 0.844                             |
| V70 $\gamma$ 2 | 0.35 | 0.443                        | 0.648                         | 0.375                             | 0.446                              | 0.352                              | 0.443                             |

---

---

|             |      |              |              |              |              |              |              |
|-------------|------|--------------|--------------|--------------|--------------|--------------|--------------|
| L71δ1       | 0.29 | 0.282        | 0.174        | 0.198        | 0.157        | 0.273        | 0.282        |
| L73δ1       | 0.19 | 0.142        | 0.082        | 0.083        | 0.118        | 0.069        | 0.142        |
| L73δ2       | 0.17 | 0.211        | 0.128        | 0.128        | 0.145        | 0.109        | 0.211        |
| <b>RMSD</b> | -    | <b>0.279</b> | <b>0.260</b> | <b>0.247</b> | <b>0.289</b> | <b>0.174</b> | <b>0.279</b> |

---

---

**Table S21.** Side-chain  $^3J_{CC\gamma}$  coupling constant of RS for six ff03-series force fields. J-coupling constants are in Hz.

|              | <b>Exp.</b> | <b><i>ff03/</i></b><br><b><i>TIP3P</i></b> | <b><i>ff03*/</i></b><br><b><i>TIP3P</i></b> | <b><i>ff03w/</i></b><br><b><i>TIP4P2005</i></b> | <b><i>ff03ws/</i></b><br><b><i>TIP4P2005</i></b> | <b><i>ff03CMAP/</i></b><br><b><i>TIP4PEw</i></b> | <b><i>ff03CMAP/</i></b><br><b><i>TIP4PD</i></b> |
|--------------|-------------|--------------------------------------------|---------------------------------------------|-------------------------------------------------|--------------------------------------------------|--------------------------------------------------|-------------------------------------------------|
| R9 $\gamma$  | 2.45        | 2.006                                      | 2.276                                       | 2.165                                           | 2.358                                            | 2.471                                            | 2.396                                           |
| R11 $\gamma$ | 2.17        | 2.143                                      | 2.141                                       | 2.355                                           | 2.193                                            | 2.609                                            | 2.648                                           |
| R13 $\gamma$ | 2.53        | 2.034                                      | 2.203                                       | 2.225                                           | 2.126                                            | 2.284                                            | 2.470                                           |
| R15 $\gamma$ | 1.89        | 2.045                                      | 2.327                                       | 2.108                                           | 2.272                                            | 2.389                                            | 2.323                                           |
| R17 $\gamma$ | 1.89        | 2.027                                      | 2.051                                       | 2.211                                           | 2.265                                            | 2.477                                            | 2.346                                           |
| R19 $\gamma$ | 2.42        | 2.415                                      | 2.029                                       | 2.116                                           | 2.138                                            | 2.338                                            | 2.399                                           |
| R21 $\gamma$ | 2.17        | 2.057                                      | 1.808                                       | 2.024                                           | 2.013                                            | 2.271                                            | 2.351                                           |
| R23 $\gamma$ | 2.56        | 2.082                                      | 2.176                                       | 2.221                                           | 2.323                                            | 2.647                                            | 2.229                                           |
| <b>RMSD</b>  | -           | <b>0.302</b>                               | <b>0.314</b>                                | <b>0.271</b>                                    | <b>0.278</b>                                     | <b>0.330</b>                                     | <b>0.311</b>                                    |

**Table S22.** Side-chain  $^3J_{\text{NC}\gamma}$  coupling constant of RS for six ff03-series force fields. J-coupling constants are in Hz.

|              | <b>Exp.</b> | <b><i>ff03/</i></b><br><b><i>TIP3P</i></b> | <b><i>ff03*/</i></b><br><b><i>TIP3P</i></b> | <b><i>ff03w/</i></b><br><b><i>TIP4P2005</i></b> | <b><i>ff03ws/</i></b><br><b><i>TIP4P2005</i></b> | <b><i>ff03CMAP/</i></b><br><b><i>TIP4PEw</i></b> | <b><i>ff03CMAP/</i></b><br><b><i>TIP4PD</i></b> |
|--------------|-------------|--------------------------------------------|---------------------------------------------|-------------------------------------------------|--------------------------------------------------|--------------------------------------------------|-------------------------------------------------|
| R9 $\gamma$  | 1.19        | 1.229                                      | 1.042                                       | 1.036                                           | 1.042                                            | 0.956                                            | 0.951                                           |
| R11 $\gamma$ | 0.98        | 1.301                                      | 1.024                                       | 0.941                                           | 0.962                                            | 0.988                                            | 0.894                                           |
| R13 $\gamma$ | 0.77        | 1.356                                      | 1.014                                       | 1.025                                           | 1.027                                            | 0.960                                            | 0.921                                           |
| R15 $\gamma$ | 0.77        | 1.301                                      | 0.907                                       | 1.107                                           | 0.948                                            | 0.982                                            | 0.917                                           |
| R17 $\gamma$ | 0.76        | 1.168                                      | 1.088                                       | 1.144                                           | 0.963                                            | 0.920                                            | 0.910                                           |
| R19 $\gamma$ | 0.79        | 0.989                                      | 1.014                                       | 1.028                                           | 1.006                                            | 0.989                                            | 1.010                                           |
| R21 $\gamma$ | 0.68        | 1.128                                      | 1.161                                       | 1.031                                           | 1.086                                            | 1.035                                            | 0.999                                           |
| R23 $\gamma$ | 0.63        | 0.870                                      | 0.793                                       | 0.880                                           | 0.879                                            | 0.941                                            | 0.937                                           |
| <b>RMSD</b>  | -           | <b>0.386</b>                               | <b>0.254</b>                                | <b>0.272</b>                                    | <b>0.233</b>                                     | <b>0.230</b>                                     | <b>0.217</b>                                    |

**Table S23.** Average half-time of IDPs simulation for six ff03-series force fields <sup>a</sup>

| Force Field          | <i>ff03/</i><br><i>TIP3P</i> | <i>ff03*/</i><br><i>TIP3P</i> | <i>ff03w/</i><br><i>TIP4P2005</i> | <i>ff03ws/</i><br><i>TIP4P2005</i> | <i>ff03CMAP/</i><br><i>TIP4PEw</i> | <i>ff03CMAP/</i><br><i>TIP4PD</i> |
|----------------------|------------------------------|-------------------------------|-----------------------------------|------------------------------------|------------------------------------|-----------------------------------|
| Half-time<br>±std/ns | 271±319                      | 331±765                       | 111±86                            | 977±2616                           | 62±50                              | 35±14                             |

<sup>a</sup>. We calculated the average half-time for IDPs that the R2 of fitted model is larger than 0.90. Here std. means standard deviation.

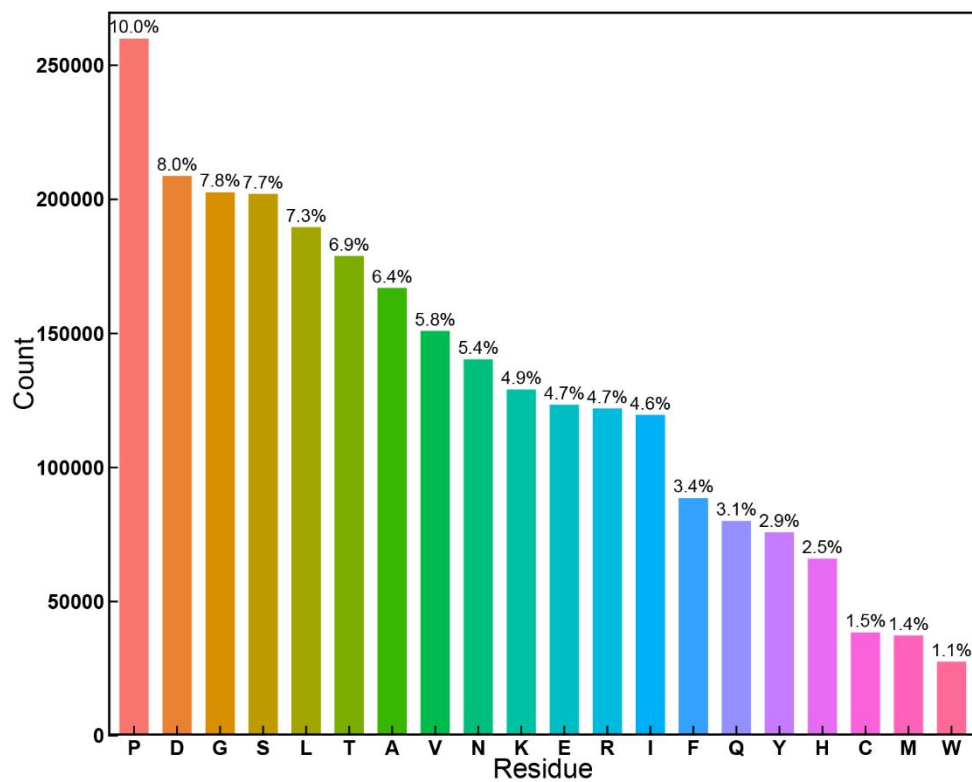

Figure S1. Count of amino acids in coil database.



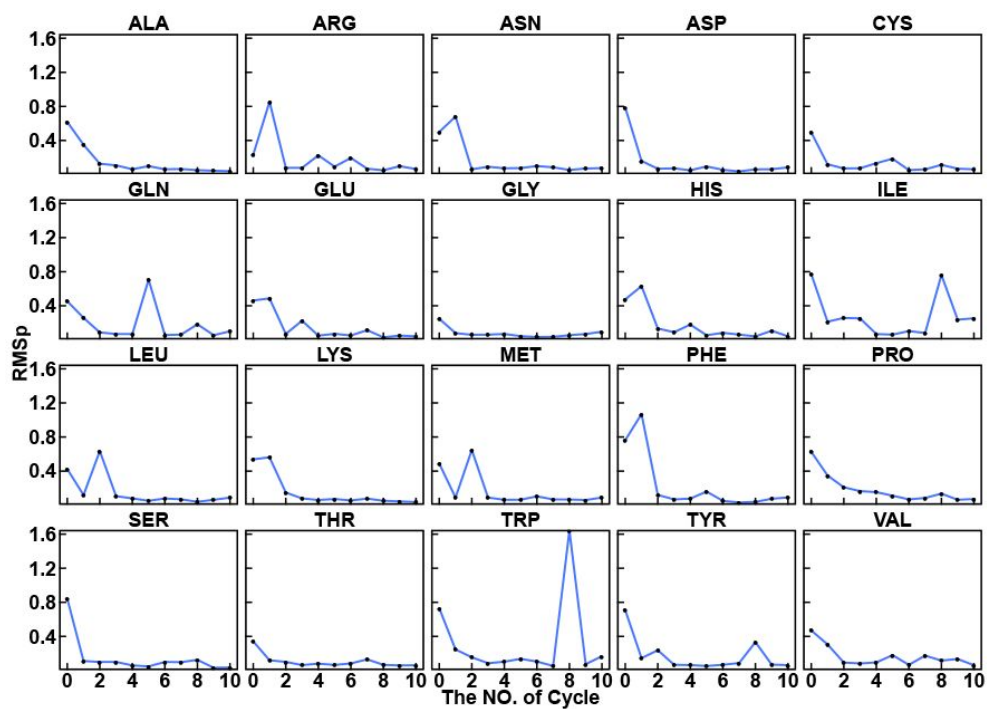

**Figure S2.** RMSp between simulation and benchmark for CMAP optimization of 20 amino acids.

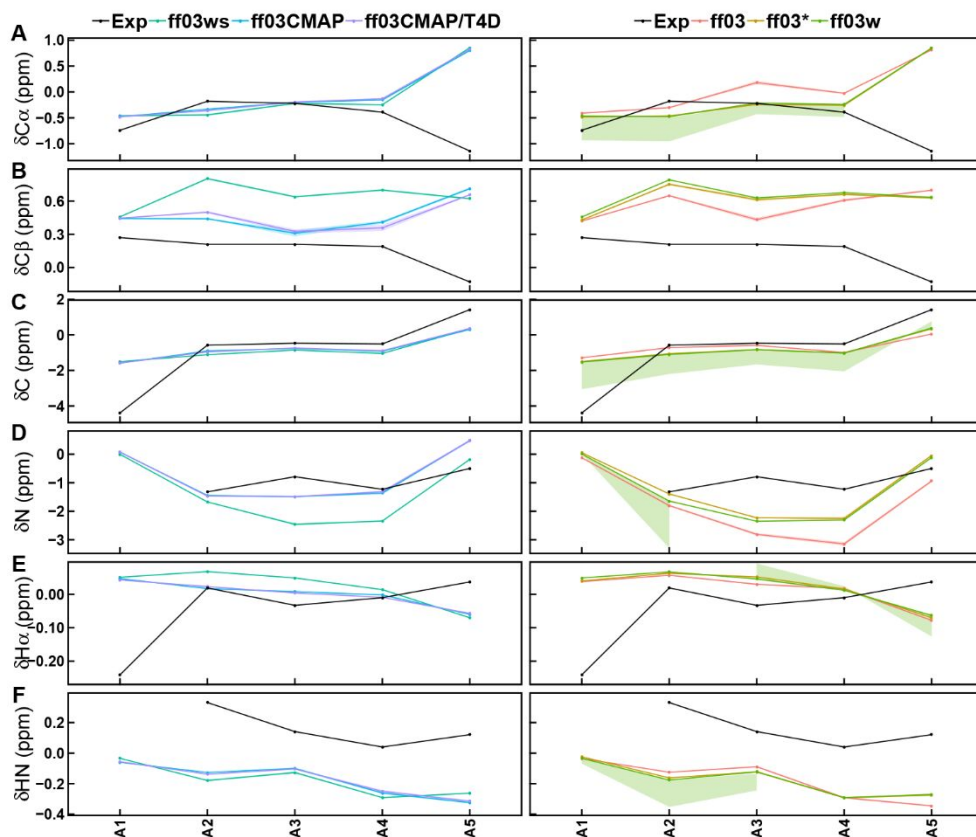

**Figure S3.** Secondary chemical shifts of simulation and experimental data for Ala<sub>5</sub>. Here ff03CMAP means ff03CMAP force field with TIP4P-Ew water model, ff03CMAP/T4D means ff03CMAP force field with TIP4P-D water model and ff03/T4D means ff03 force field with TIP4P-D water model. Simulated and experimental secondary chemical shifts for (A) C $\alpha$ , (B) C $\beta$ , (C) C, (D) N, (E) H $\alpha$  and (F) HN. Simulated values are shown for ff03 (red), ff03\* (brown), ff03w (light green), ff03ws (cyan), ff03CMAP (blue), ff03CMAP/T4D (violet) and ff03/T4D (mauve). Experimental values are displayed as black lines. The shadow means the stand error of mean.

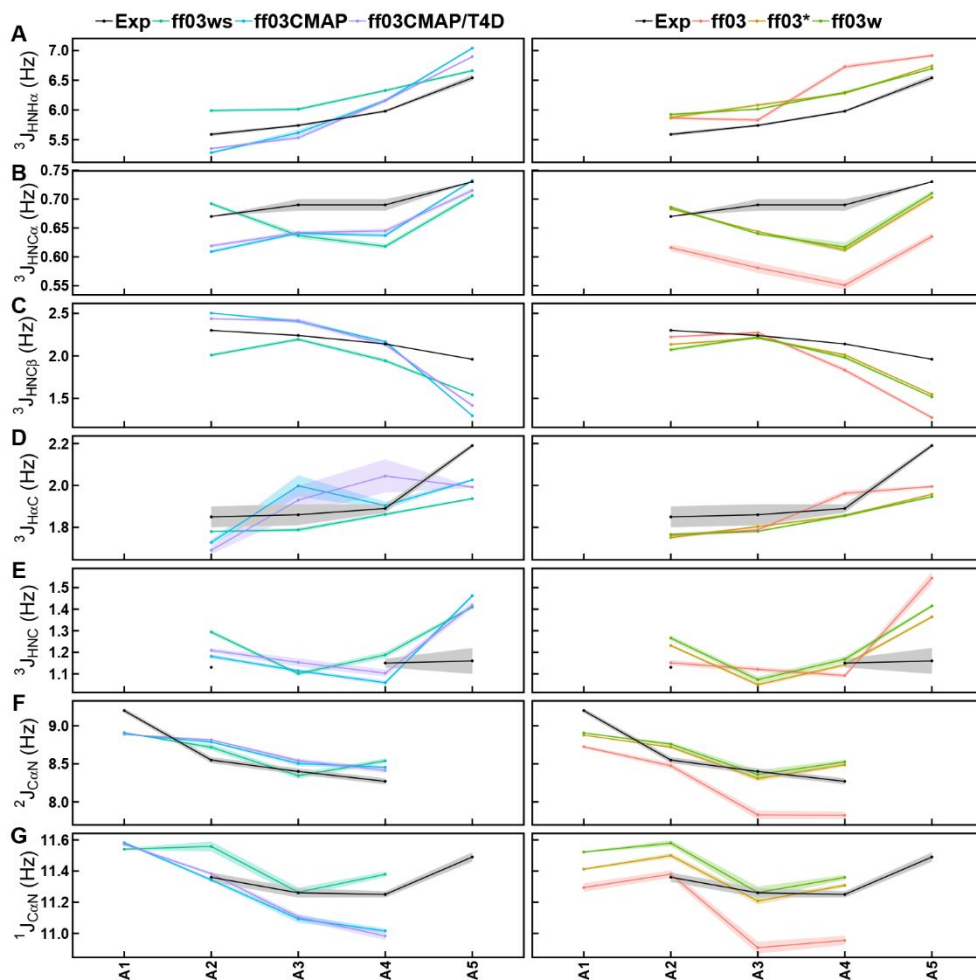

**Figure S4.** Scalar coupling constants of simulation and experimental data for Ala<sub>5</sub>. Simulated and experimental scalar coupling constants for (A)  $^3J_{\text{HNH}\alpha}$ , (B)  $^3J_{\text{HNC}\alpha}$ , (C)  $^3J_{\text{HNC}\beta}$ , (D)  $^3J_{\text{HaC}}$ , (E)  $^3J_{\text{HNC}}$ , (F)  $^2J_{\text{CaN}}$  and (G)  $^1J_{\text{CaN}}$ .

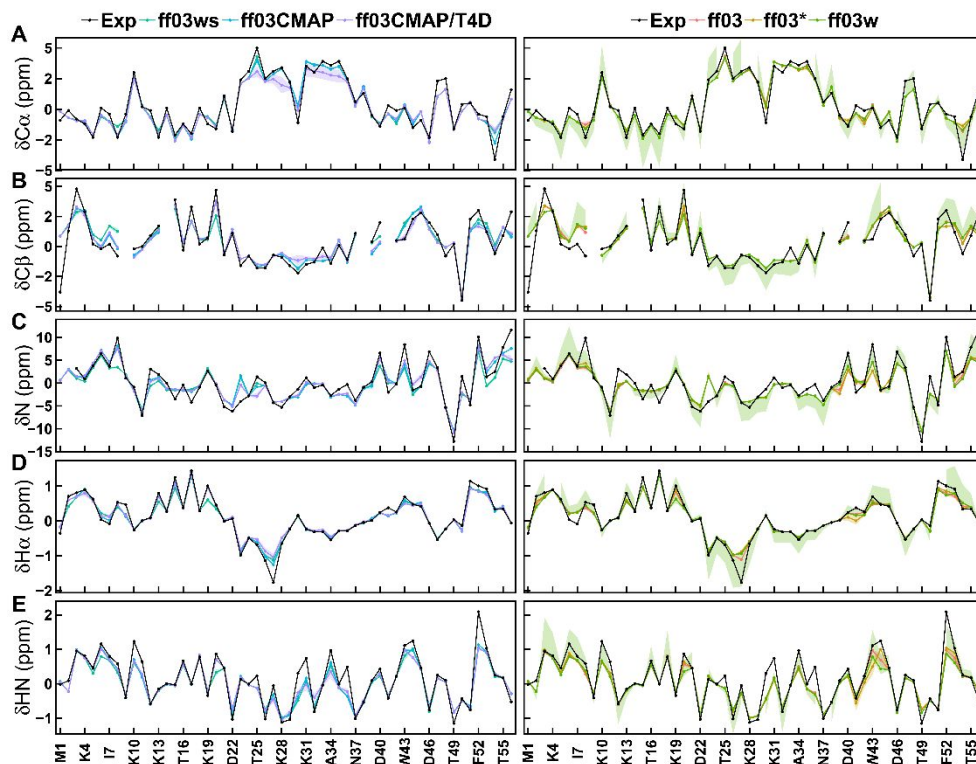

**Figure S5.** Secondary chemical shifts of simulation and experimental data for GB3. Simulated and experimental secondary chemical shifts for (A)  $C\alpha$ , (B)  $C\beta$ , (C) N, (D)  $H\alpha$  and (E) HN.

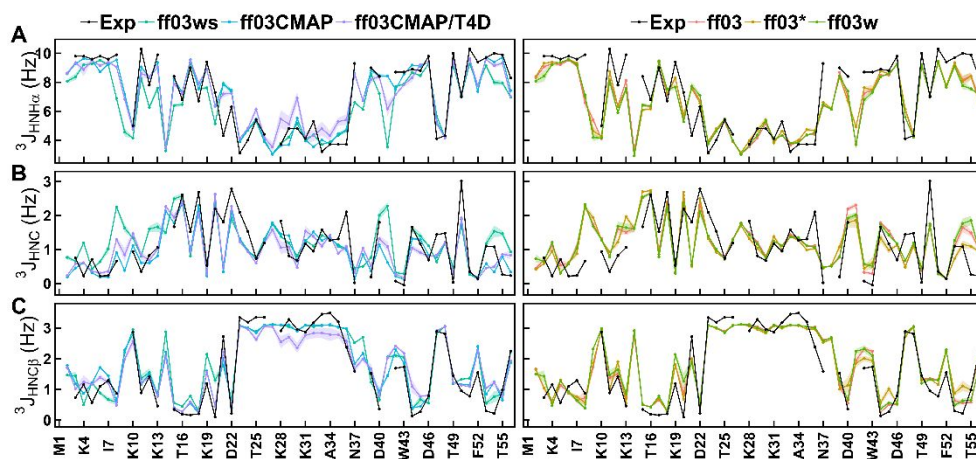

**Figure S6.** Scalar coupling constants of simulation and experimental data for GB3. Simulated and experimental scalar coupling constants for (A)  $^3J_{\text{HNH}\alpha}$ , (B)  $^3J_{\text{HNC}}$  and (C)  $^3J_{\text{HNC}\beta}$ .

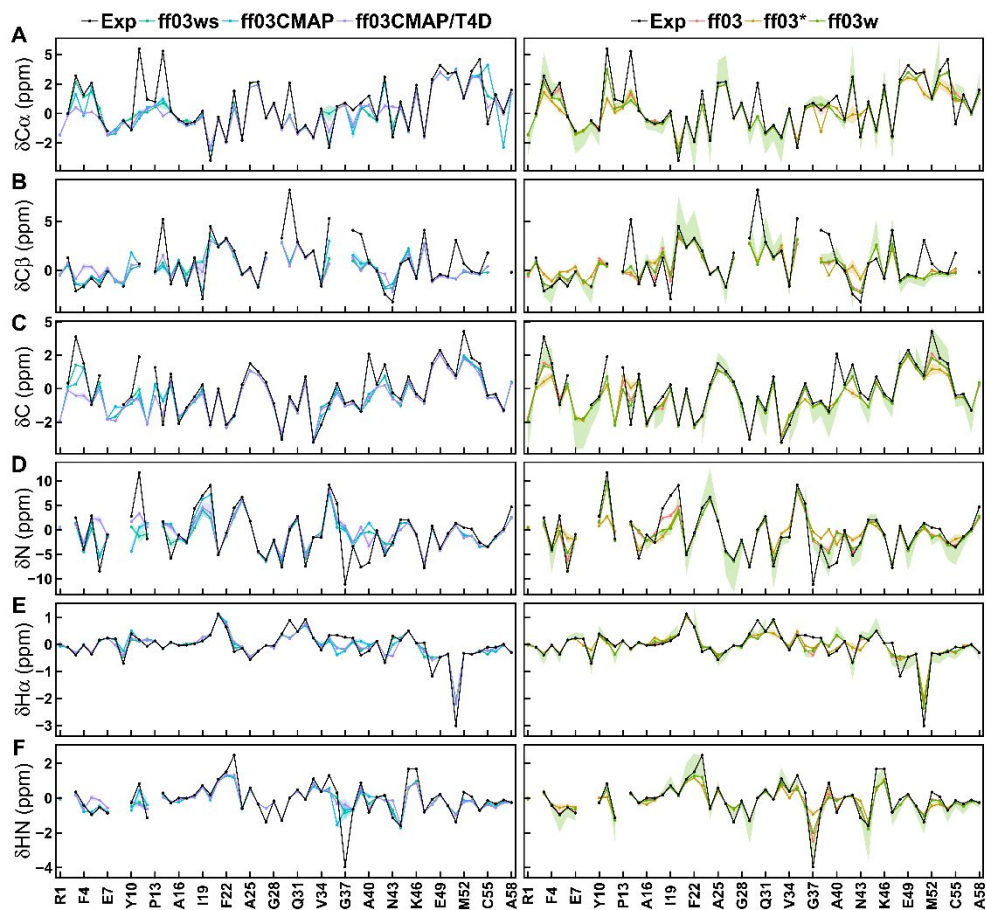

**Figure S7.** Secondary chemical shifts of simulation and experimental data for BPTI. Simulated and experimental secondary chemical shifts for (A)  $C\alpha$ , (B)  $C\beta$ , (C) C, (D) N, (E)  $H\alpha$  and (F) HN.

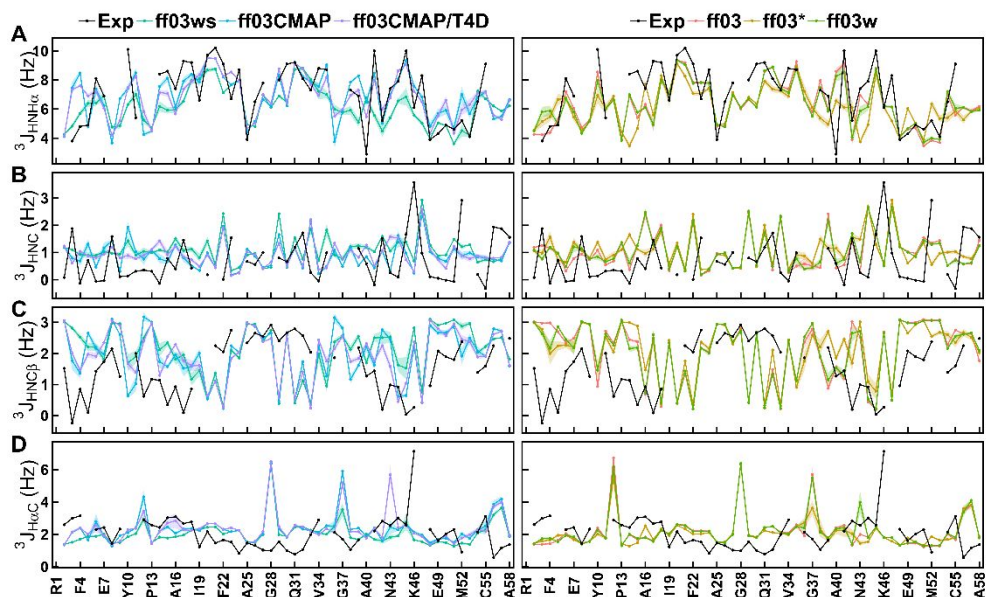

**Figure S8.** Scalar coupling constants of simulation and experimental data for BPTI. Simulated and experimental scalar coupling constants for (A)  ${}^3J_{\text{HNH}\alpha}$ , (B)  ${}^3J_{\text{HNC}}$ , (C)  ${}^3J_{\text{HNC}\beta}$  and (D)  ${}^3J_{\text{H}\alpha\text{C}}$ .



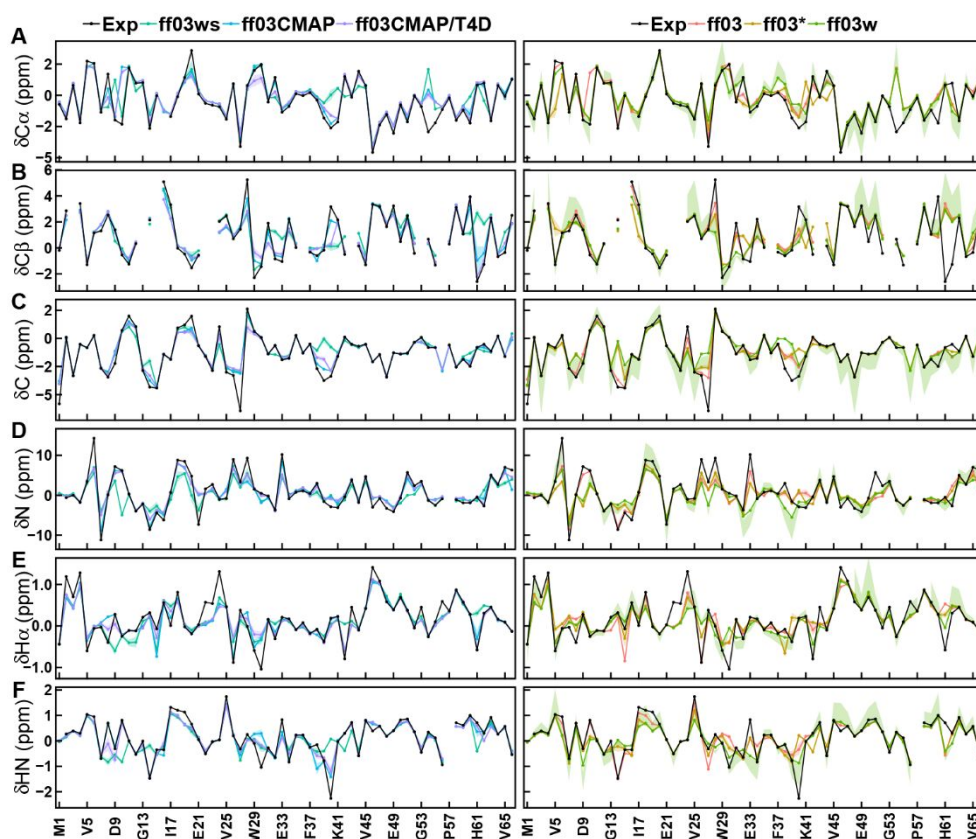

**Figure S9.** Secondary chemical shifts of simulation and experimental data for CspTm. Simulated and experimental secondary chemical shifts for (A) C $\alpha$ , (B) C $\beta$ , (C) C, (D) N, (E) H $\alpha$  and (F) HN.



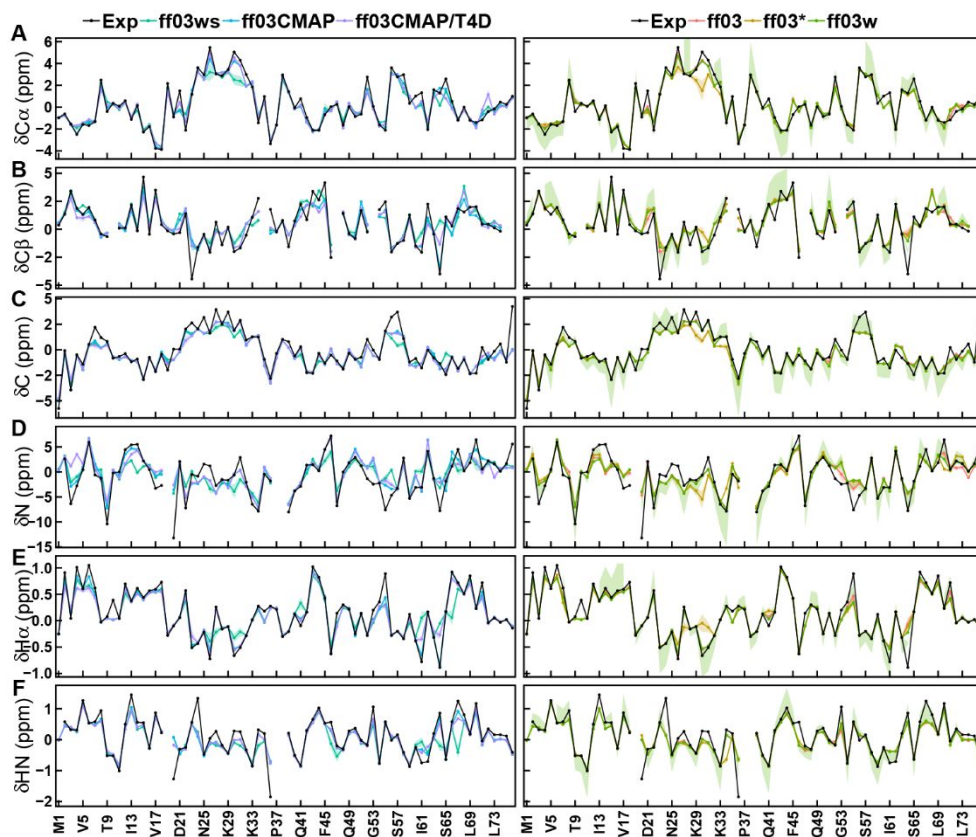

**Figure S10.** Secondary chemical shifts of simulation and experimental data for ubiquitin. Simulated and experimental secondary chemical shifts for (A)  $C\alpha$ , (B)  $C\beta$ , (C) C, (D) N, (E)  $H\alpha$  and (F) HN.

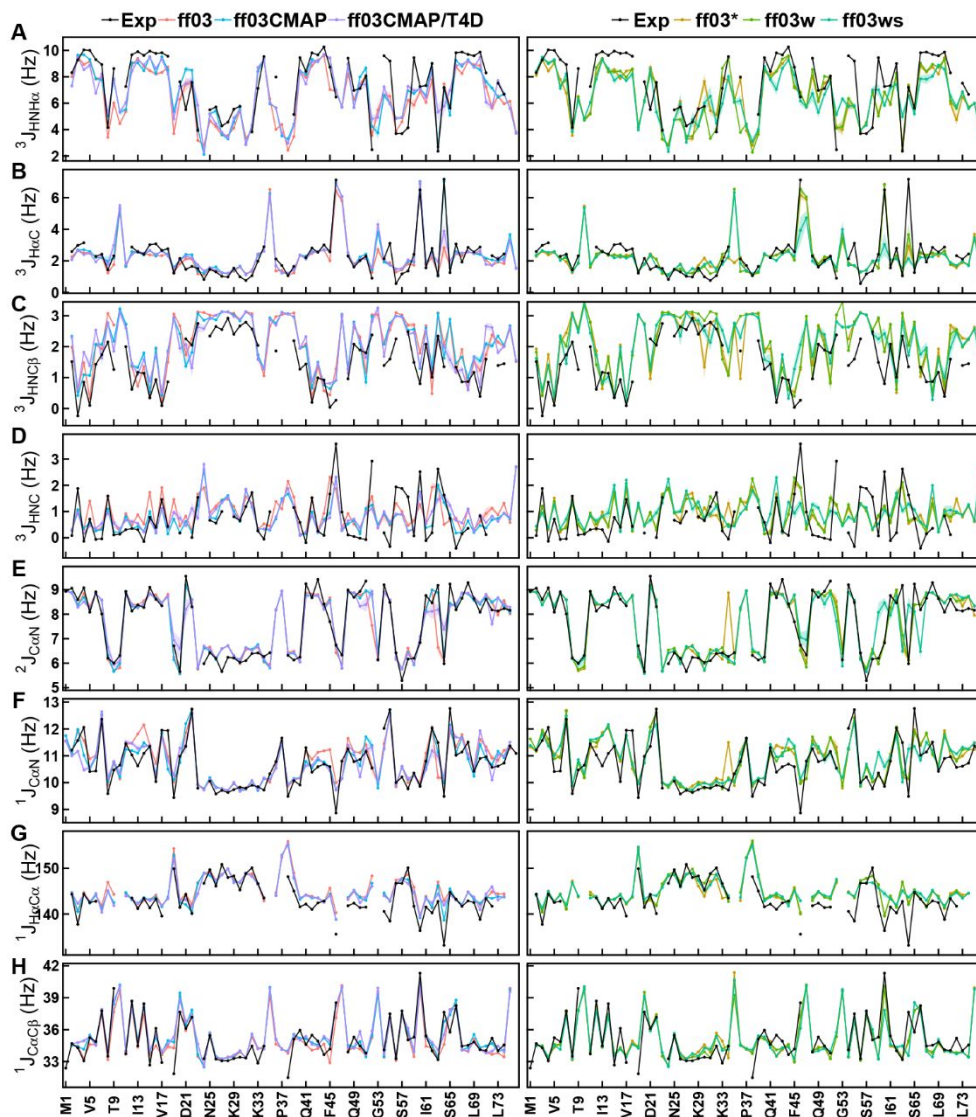

**Figure S11.** Scalar coupling constants of simulation and experimental data for ubiquitin. Simulated and experimental scalar coupling constants for (A)  ${}^3J_{\text{HNH}\alpha}$ , (B)  ${}^3J_{\text{HaC}}$ , (C)  ${}^3J_{\text{HNC}\beta}$ , (D)  ${}^3J_{\text{HNC}}$ , (E)  ${}^2J_{\text{CaN}}$ , (F)  ${}^1J_{\text{CaN}}$ , (G)  ${}^1J_{\text{HaCa}}$  and (H)  ${}^1J_{\text{CaCb}}$ .

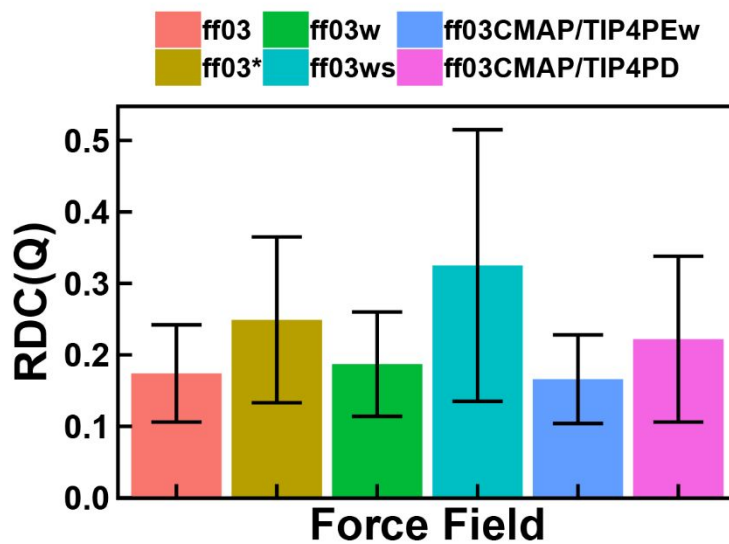

**Figure S12.** Backbone RDC of simulation of six ff03-series force fields for ubiquitin. Error bar means the standard deviation of calculation.

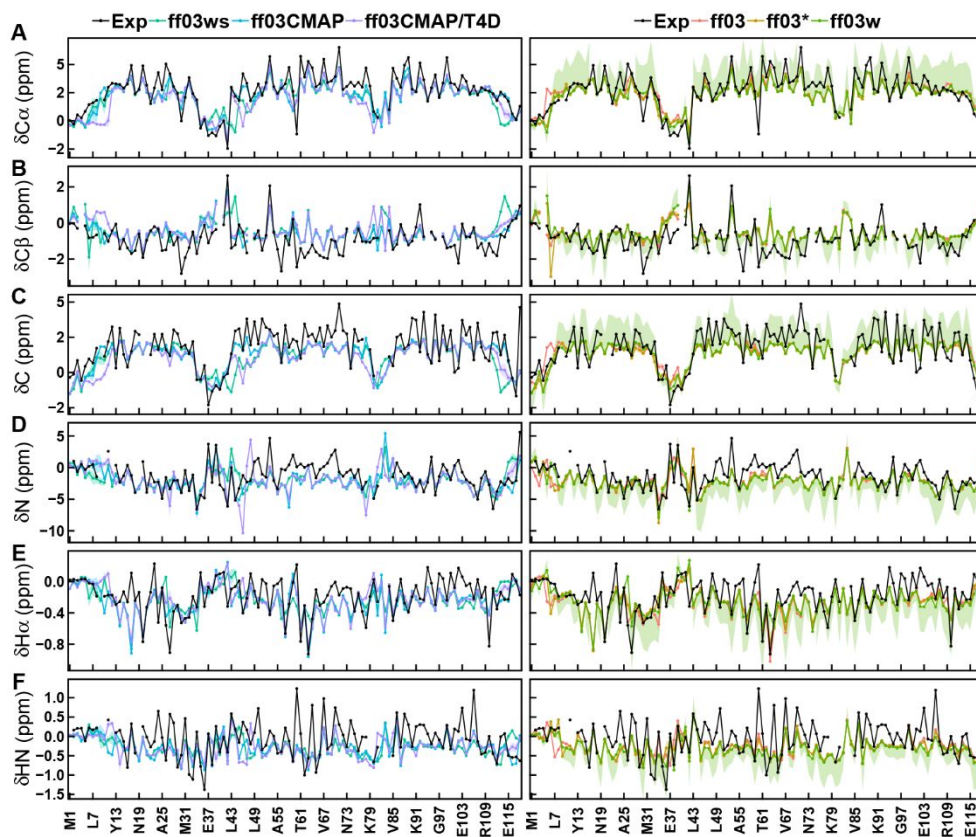

**Figure S13.** Secondary chemical shifts of simulation and experimental data for SPR17. Simulated and experimental secondary chemical shifts for (A)  $C\alpha$ , (B)  $C\beta$ , (C) C, (D) N, (E)  $H\alpha$  and (F) HN.

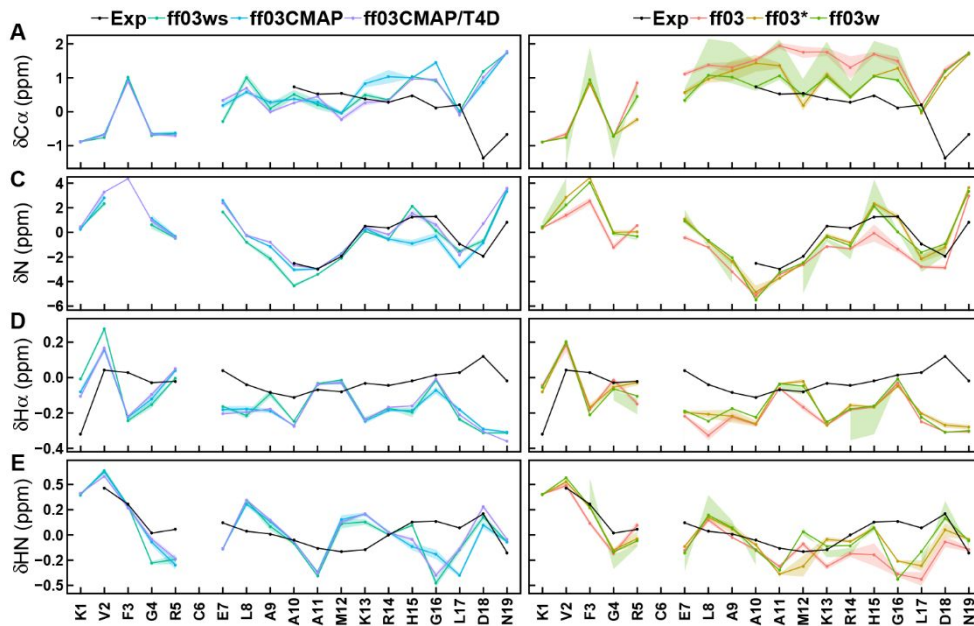

**Figure S14.** Secondary chemical shifts of simulation and experimental data for HEWL19. Simulated and experimental secondary chemical shifts for (A) C $\alpha$ , (B) N, (C) H $\alpha$  and (D) HN.

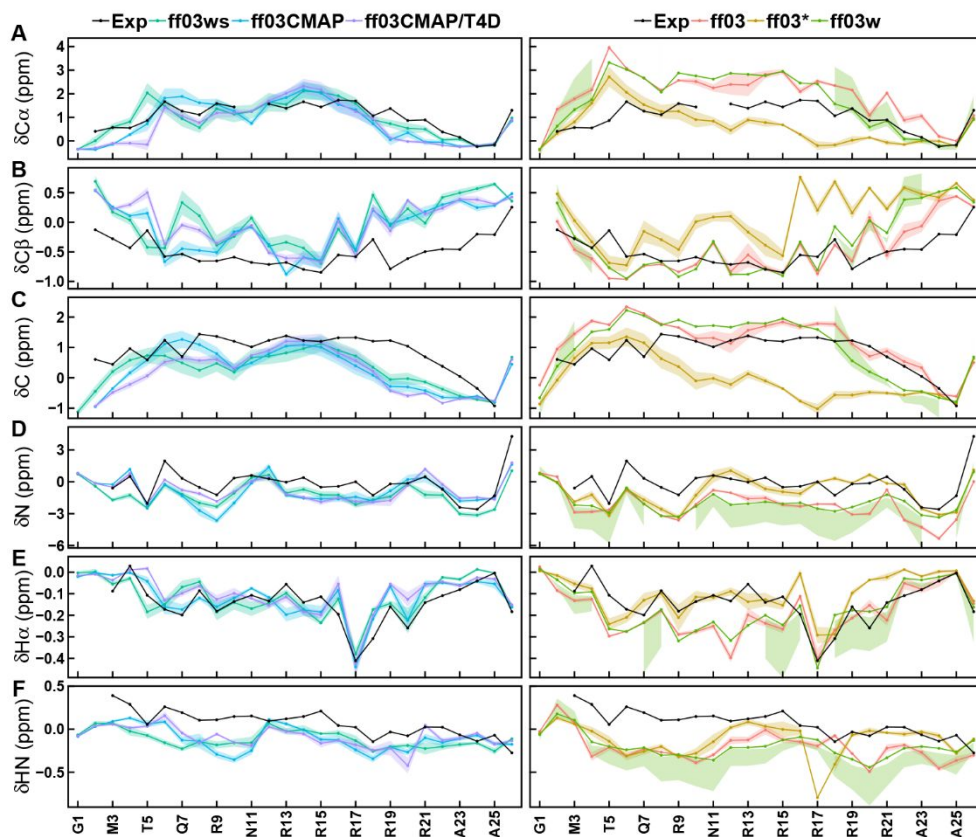

**Figure S15.** Secondary chemical shifts of simulation and experimental data for HIVRev. Simulated and experimental secondary chemical shifts for (A)  $C\alpha$ , (B)  $C\beta$ , (C) C, (D) N, (E)  $H\alpha$  and (F) HN.



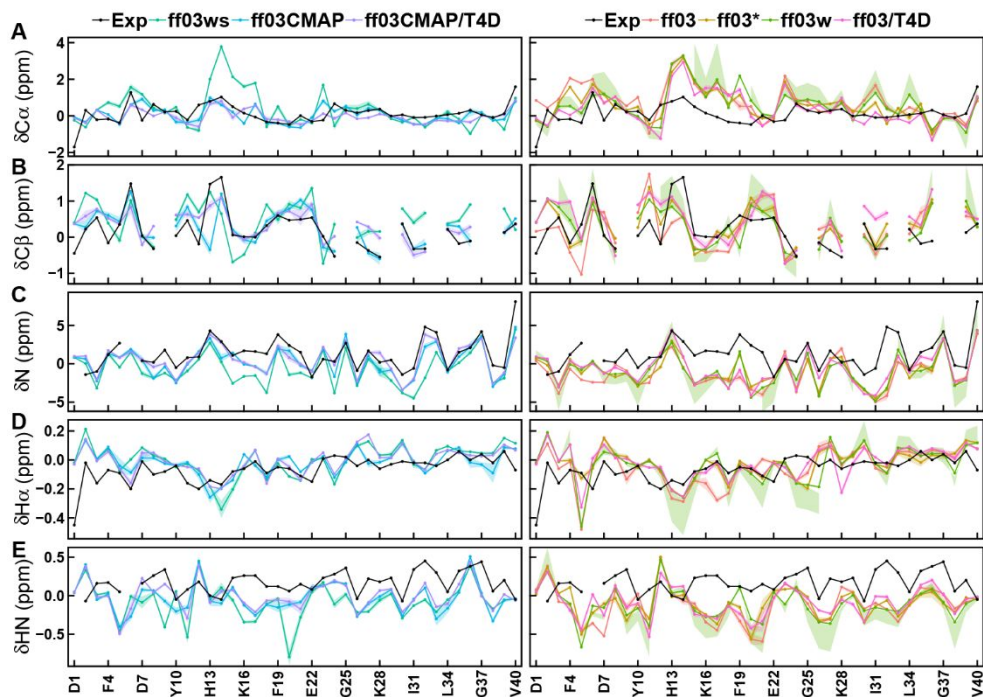

**Figure S16.** Secondary chemical shifts of simulation and experimental data for A $\beta$ 40. Simulated and experimental secondary chemical shifts for (A) C $\alpha$ , (B) C $\beta$ , (C) N, (D) H $\alpha$  and (E) HN.

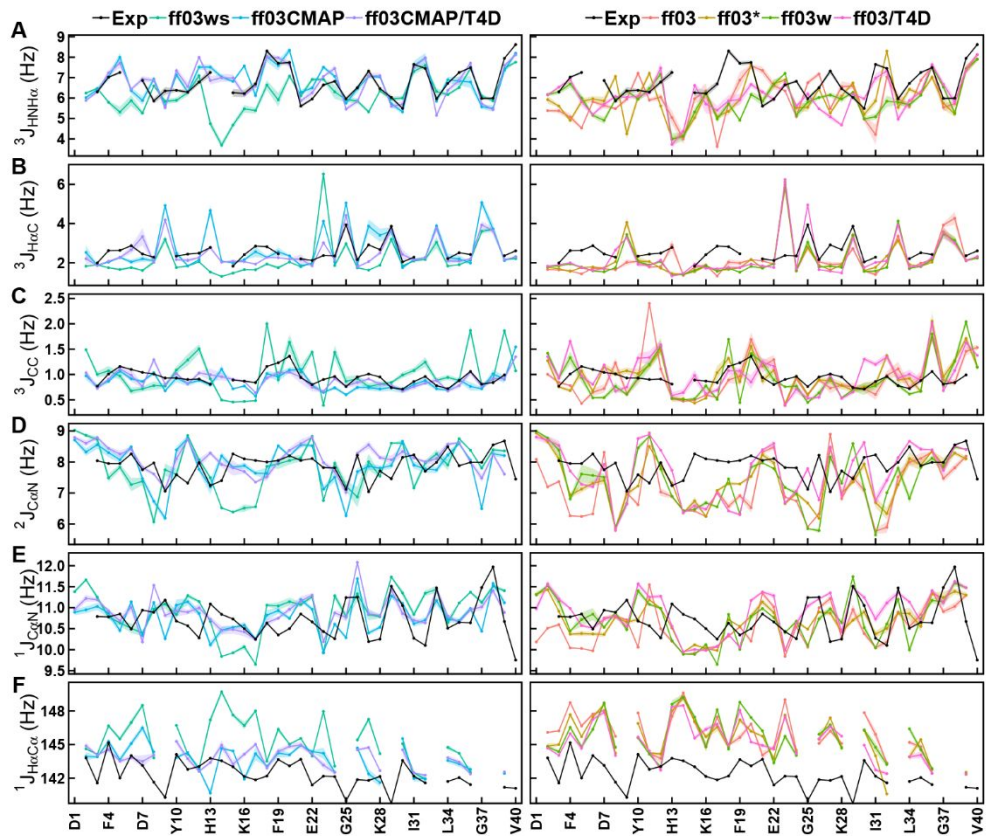

**Figure S17.** Scalar coupling constants of simulation and experimental data for A $\beta$ 40. Simulated and experimental scalar coupling constants for (A)  $^3J_{\text{HNH}\alpha}$ , (B)  $^3J_{\text{H}\alpha\text{C}}$ , (C)  $^3J_{\text{CC}}$ , (D)  $^2J_{\text{C}\alpha\text{N}}$ , (E)  $^1J_{\text{C}\alpha\text{N}}$  and (F)  $^1J_{\text{H}\alpha\text{C}\alpha}$ .



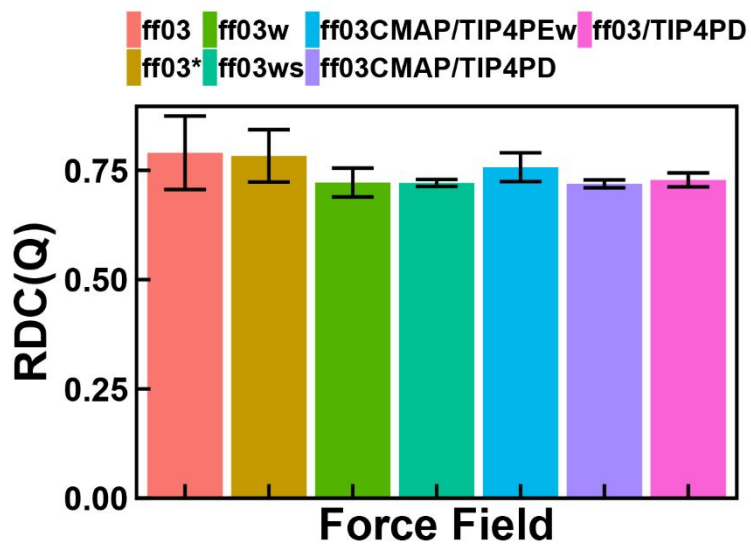

**Figure S18.** Backbone RDC of simulation of six ff03-series force fields for Aβ40. Error bar means the standard deviation of calculation.

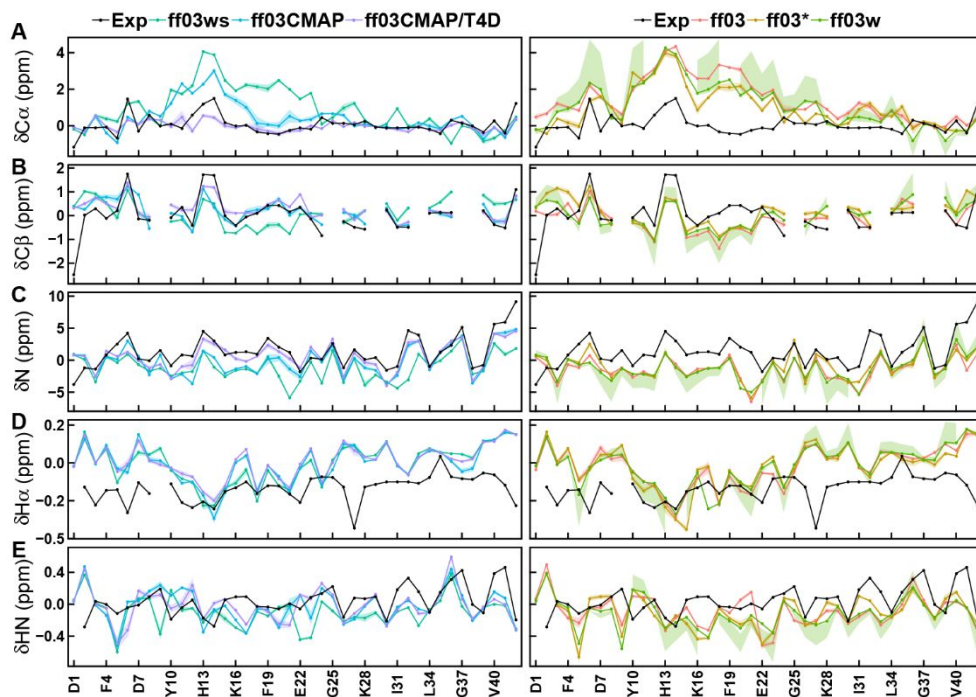

**Figure S19.** Secondary chemical shifts of simulation and experimental data for A $\beta$ 42. Simulated and experimental secondary chemical shifts for (A) C $\alpha$ , (B) C $\beta$ , (C) N, (D) H $\alpha$  and (E) HN.

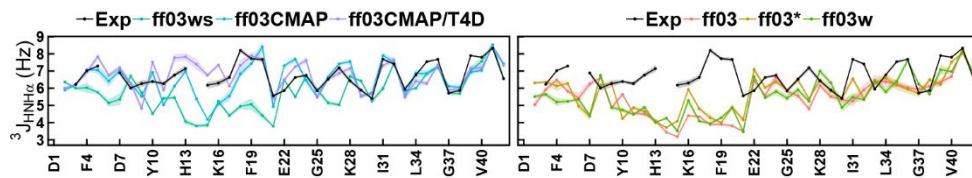

**Figure S20.** Scalar coupling constants of simulation and experimental data for A $\beta$ 42. Simulated and experimental scalar coupling constants for  $^3J_{\text{HNH}\alpha}$ .

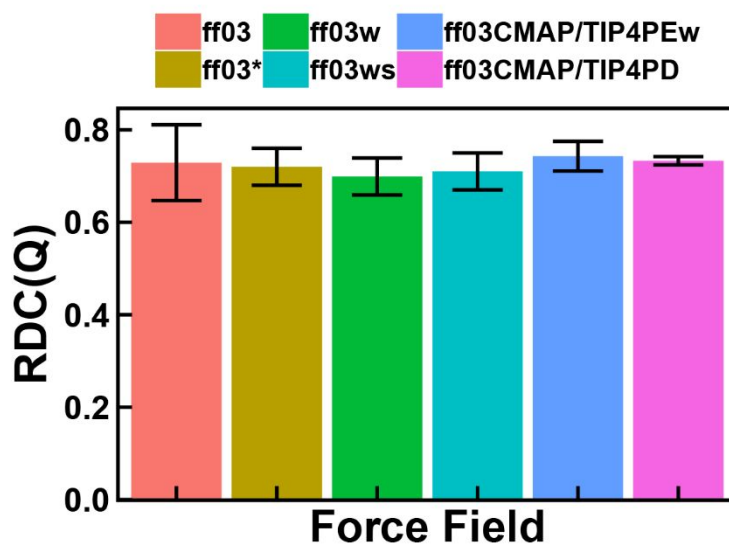

**Figure S21.** Backbone RDC of simulation of six ff03-series force fields for A $\beta$ 40. Error bar means the standard deviation of calculation.

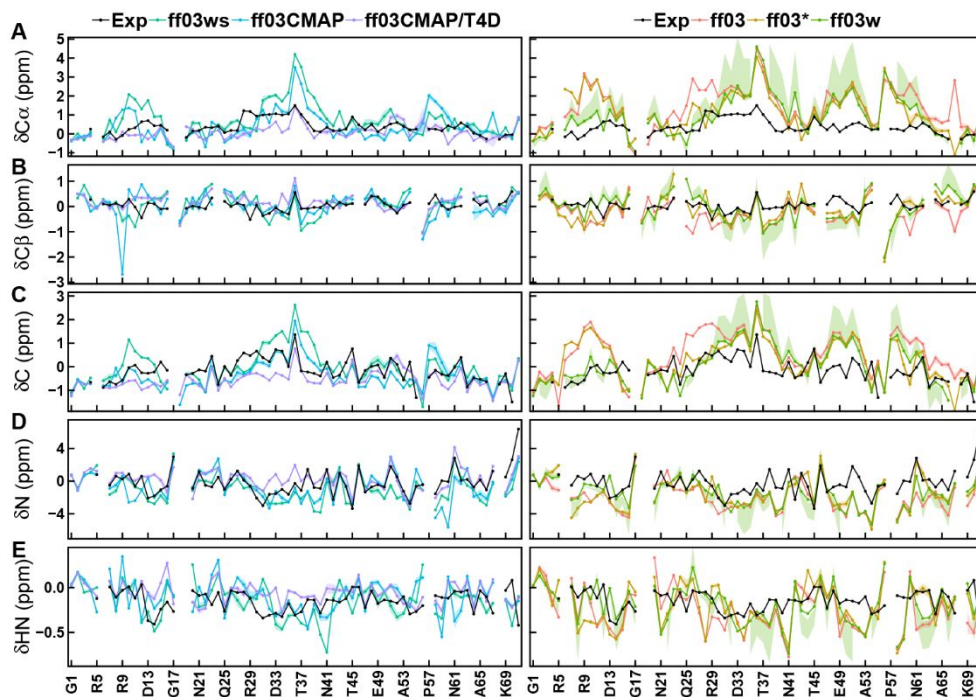

**Figure S22.** Secondary chemical shifts of simulation and experimental data for ACTR. Simulated and experimental secondary chemical shifts for (A)  $C\alpha$ , (B)  $C\beta$ , (C) C, (D) N and (E) HN.

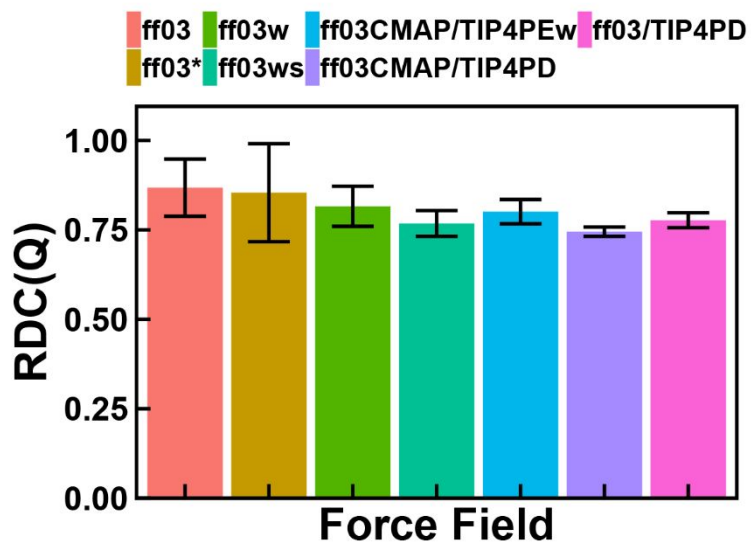

**Figure S23.** Backbone RDC of simulation of six ff03-series force fields for ACTR. Error bar means the standard deviation of calculation.

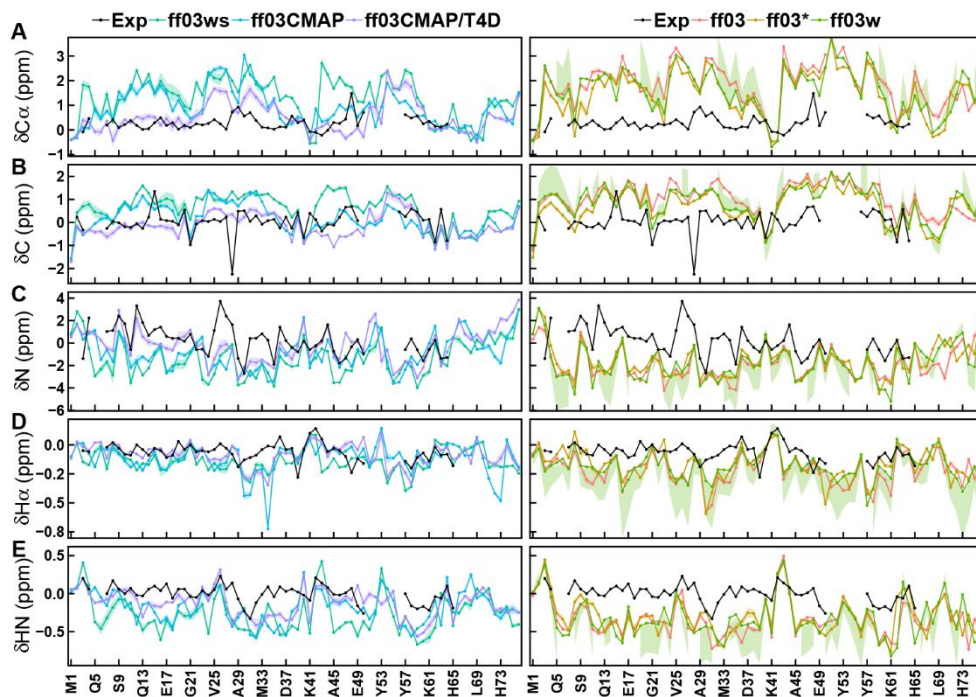

**Figure S24.** Secondary chemical shifts of simulation and experimental data for IA3. Simulated and experimental secondary chemical shifts for (A)  $C\alpha$ , (B) C, (C) N, (D)  $H\alpha$  and (E) HN.

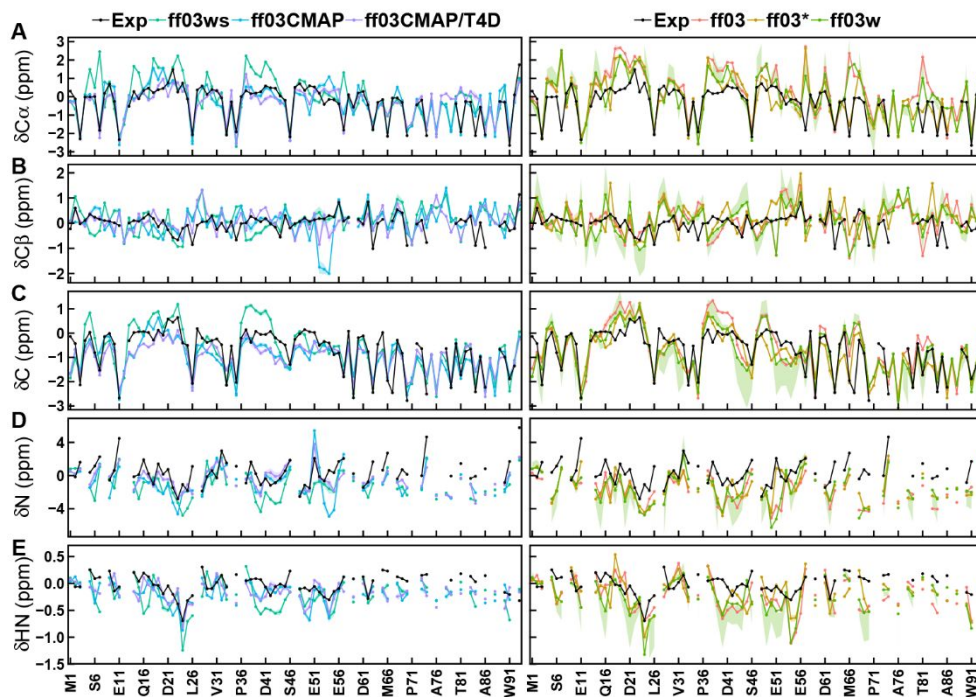

**Figure S25.** Secondary chemical shifts of simulation and experimental data for p53N. Simulated and experimental secondary chemical shifts for (A) C $\alpha$ , (B) C $\beta$ , (C) C, (D) N and (E) HN.



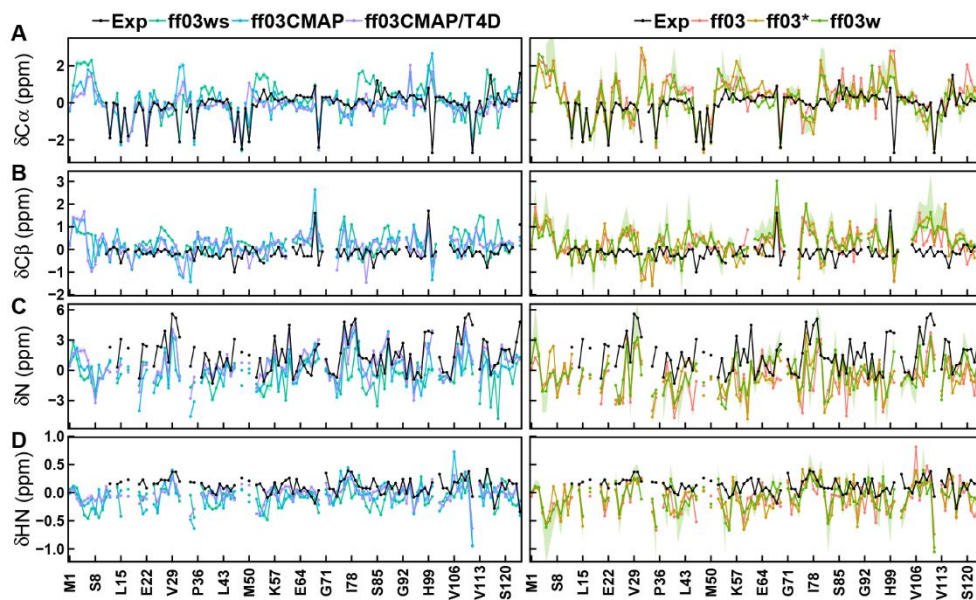

**Figure S26.** Secondary chemical shifts of simulation and experimental data for tauF4. Simulated and experimental secondary chemical shifts for (A)  $C\alpha$ , (B)  $C\beta$ , (C) N and (D) HN.

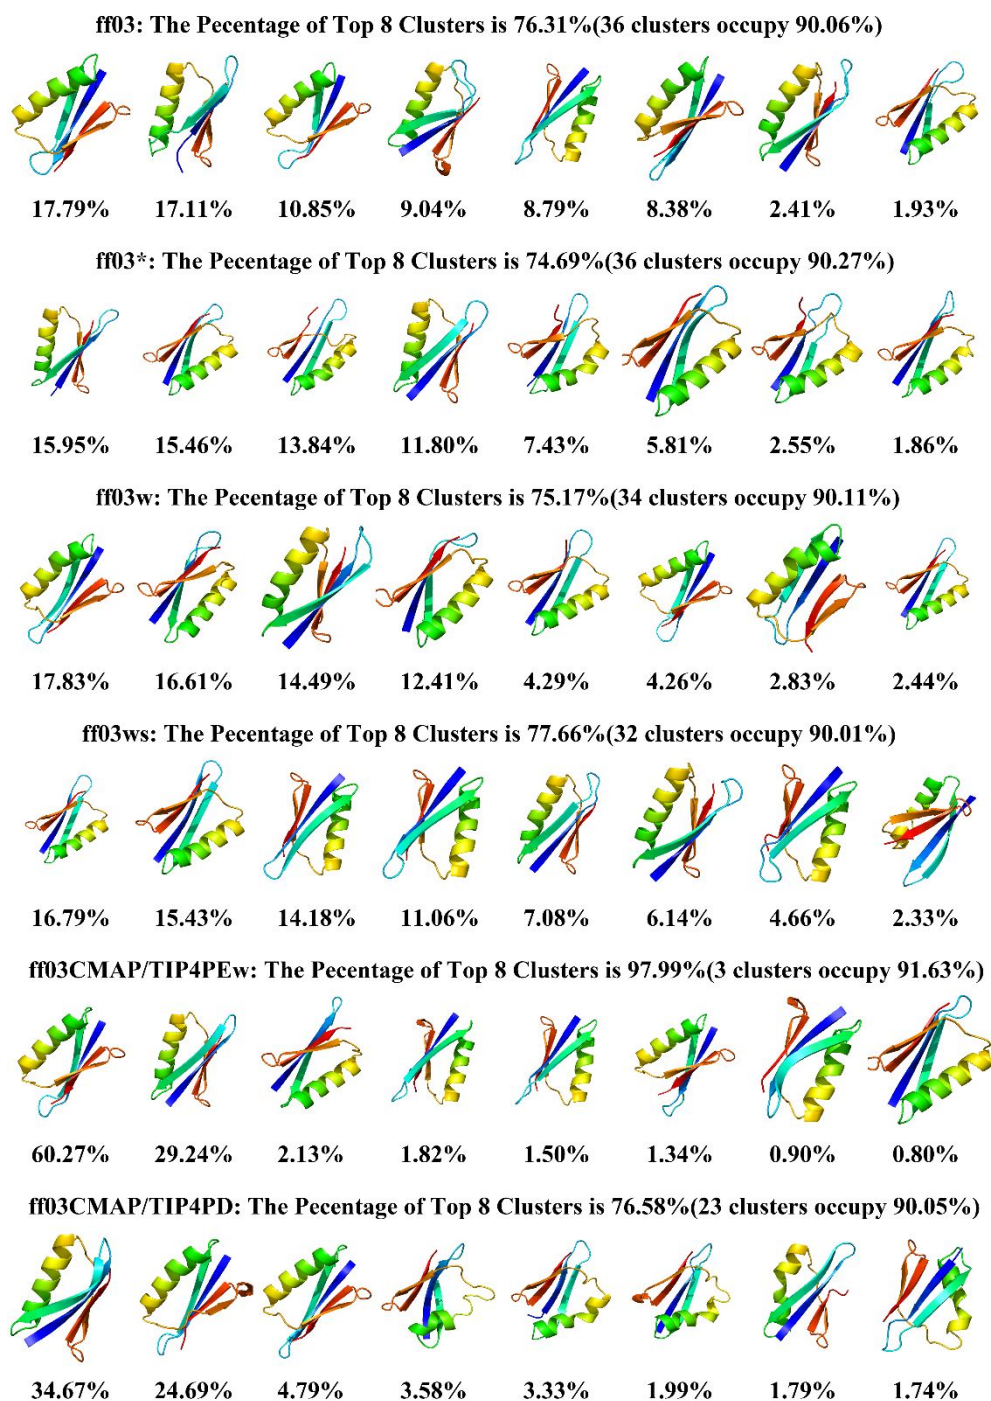

**Figure S27.** Conformation clustering of simulation for GB3. For each force field, we showed delegate conformations of top 8 clusters at most. And we showed the information of population of displayed conformation and numbers of clusters occupy just more than 90% for each force field.

**ff03: The Percentage of Top 8 Clusters is 81.77%(16 clusters occupy 90.03%)**

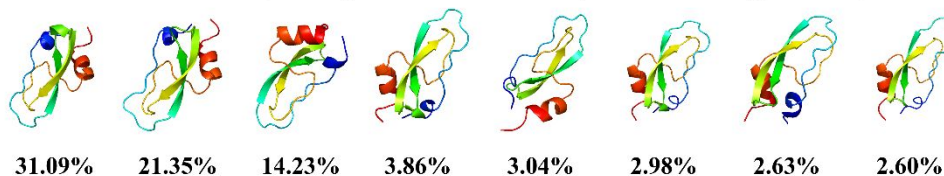

**ff03\*: The Percentage of Top 8 Clusters is 34.11%(136 clusters occupy 90.00%)**

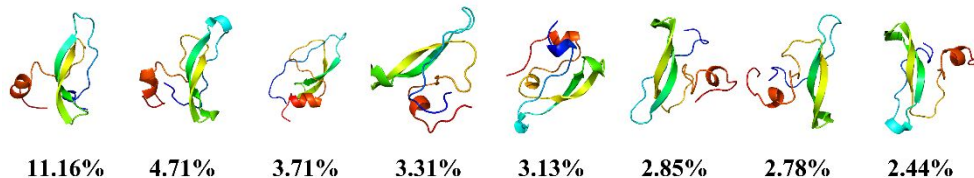

**ff03w: The Percentage of Top 8 Clusters is 61.35%(56 clusters occupy 90.07%)**

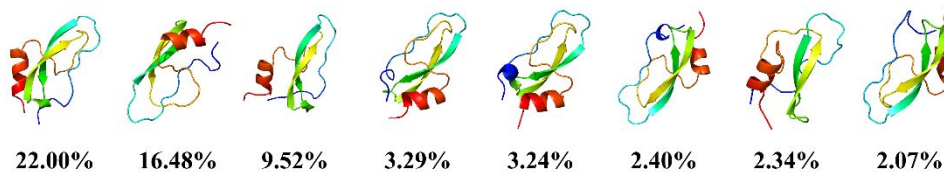

**ff03ws: The Percentage of Top 8 Clusters is 19.64%(264 clusters occupy 90.02%)**

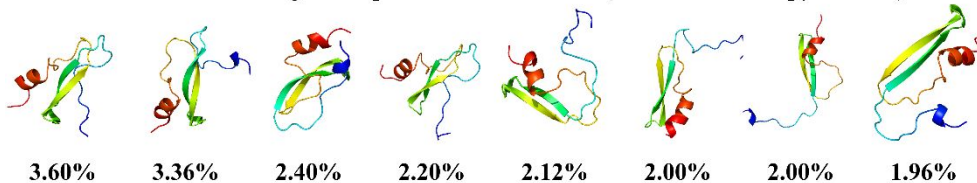

**ff03CMAP/TIP4PEw: The Percentage of Top 8 Clusters is 48.74%(66 clusters occupy 90.01%)**

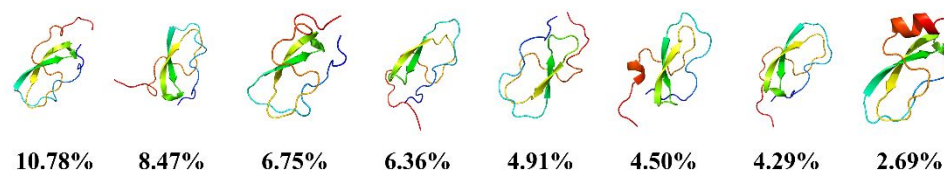

**ff03CMAP/TIP4PD: The Percentage of Top 8 Clusters is 31.55%(186 clusters occupy 90.06%)**

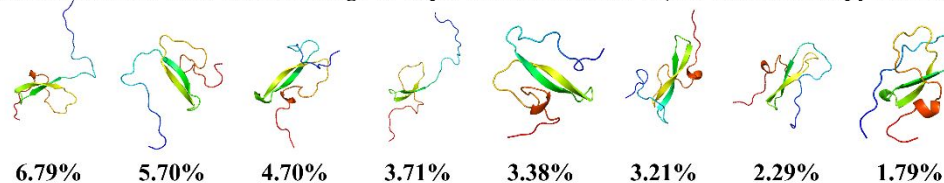

**Figure S28.** Conformation clustering of simulation for BPTI.

**ff03: The Percentage of Top 5 Clusters is 100.00%(2 clusters occupy 96.67%)**

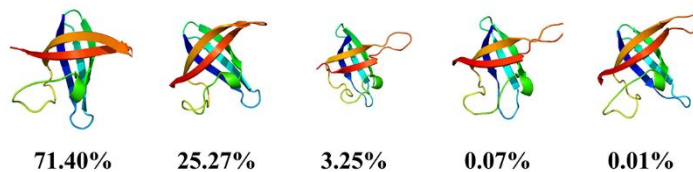

**ff03\*: The Percentage of Top 8 Clusters is 92.73%(7 clusters occupy 90.25%)**

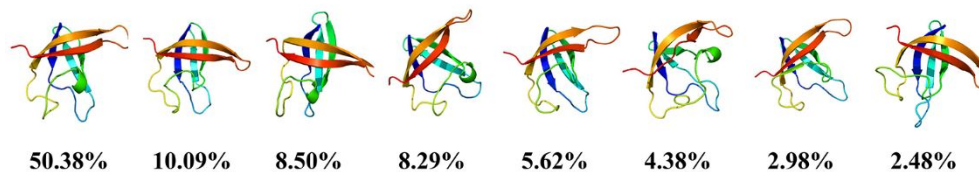

**ff03w: The Percentage of Top 8 Clusters is 99.24%(5 clusters occupy 93.53%)**

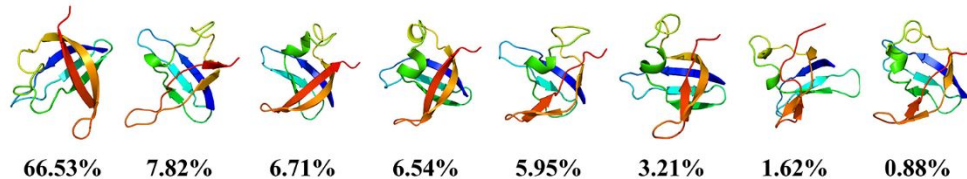

**ff03ws: The Percentage of Top 8 Clusters is 95.05%(6 clusters occupy 90.14%)**

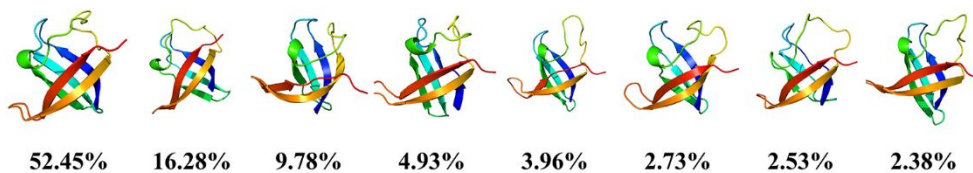

**ff03CMAP/TIP4PEw: The Percentage of Top 3 Clusters is 100.00%(1 clusters occupy 96.47%)**

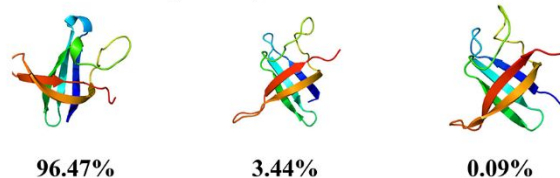

**ff03CMAP/TIP4PD: The Percentage of Top 8 Clusters is 93.36%(7 clusters occupy 91.12%)**

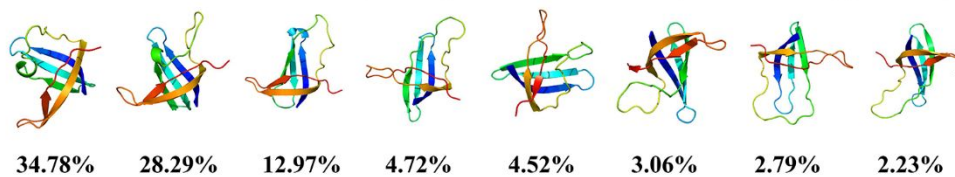

**Figure S29.** Conformation clustering of simulation for CspTm.



**ff03: The Percentage of Top 3 Clusters is 100.00%(2 clusters occupy 99.75%)**

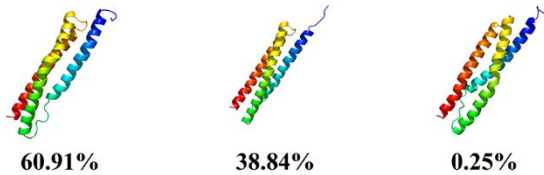

**ff03\*: The Percentage of Top 4 Clusters is 100.00%(2 clusters occupy 98.09%)**

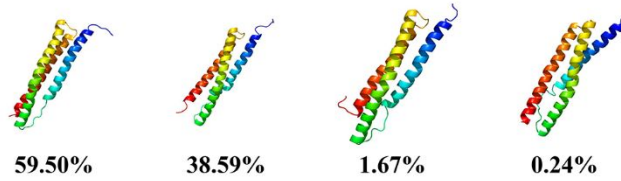

**ff03w: The Percentage of Top 8 Clusters is 100.00%(3 clusters occupy 93.08%)**

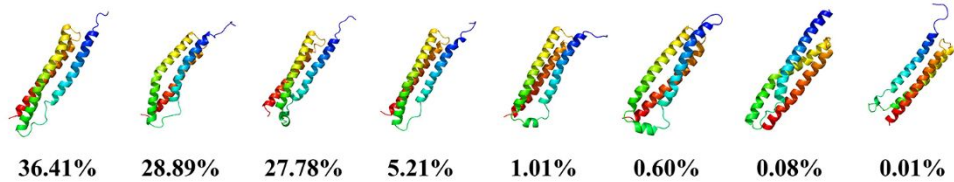

**ff03ws: The Percentage of Top 8 Clusters is 88.30%(9 clusters occupy 90.53%)**

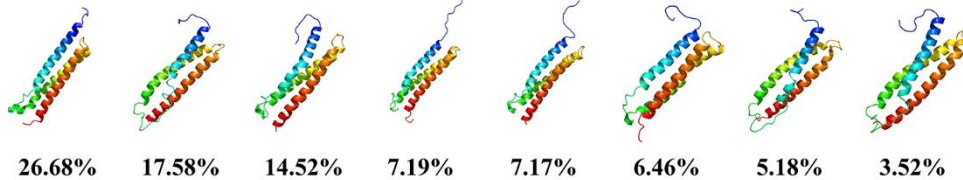

**ff03CMAP/TIP4PEw: The Percentage of Top 8 Clusters is 93.10%(8 clusters occupy 93.10%)**

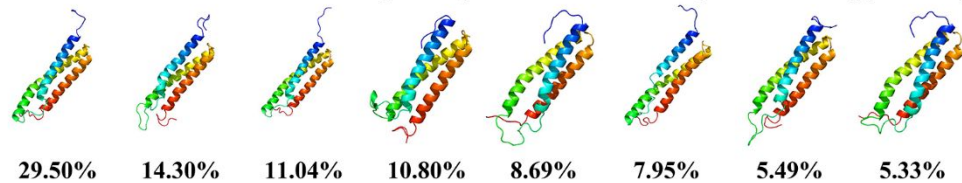

**ff03CMAP/TIP4PD: The Percentage of Top 8 Clusters is 84.05%(12 clusters occupy 90.45%)**

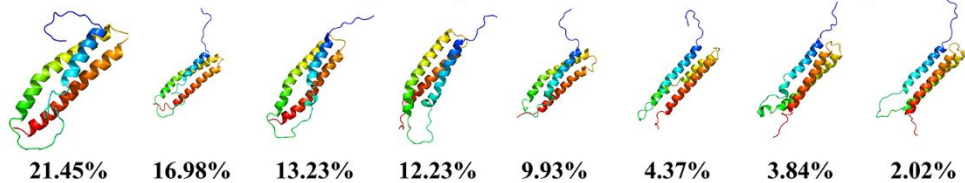

**Figure S30.** Conformation clustering of simulation for SPR17.

**ff03: The Percentage of Top 8 Clusters is 45.80%(48 clusters occupy 90.30%)**

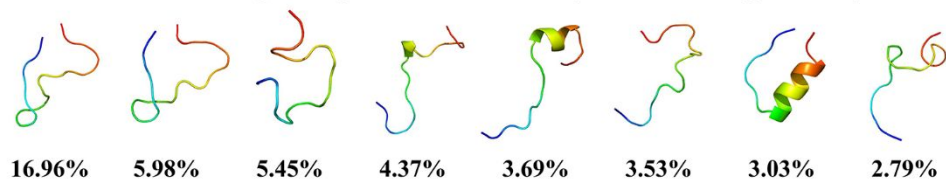

**ff03\*: The Percentage of Top 8 Clusters is 20.45%(127 clusters occupy 90.05%)**

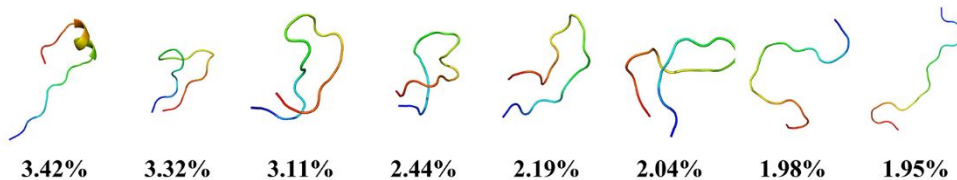

**ff03w: The Percentage of Top 8 Clusters is 19.39%(118 clusters occupy 90.06%)**

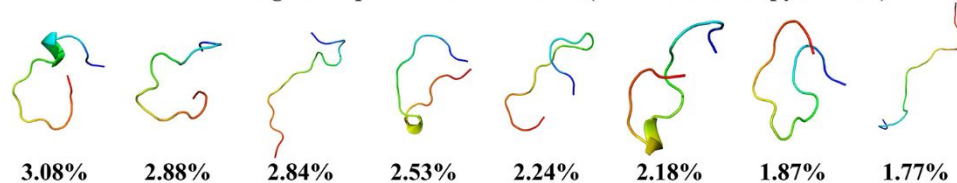

**ff03ws: The Percentage of Top 8 Clusters is 17.54%(159 clusters occupy 90.04%)**

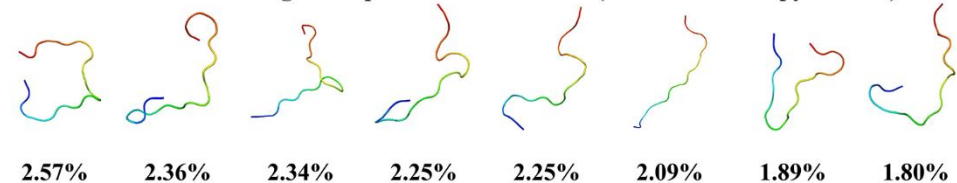

**ff03CMAP/TIP4PEw: The Percentage of Top 8 Clusters is 30.55%(75 clusters occupy 90.10%)**

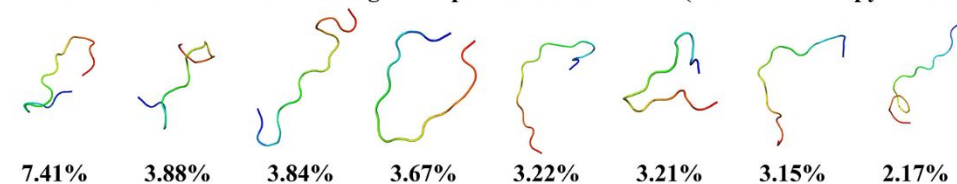

**ff03CMAP/TIP4PD: The Percentage of Top 8 Clusters is 28.72%(84 clusters occupy 90.00%)**

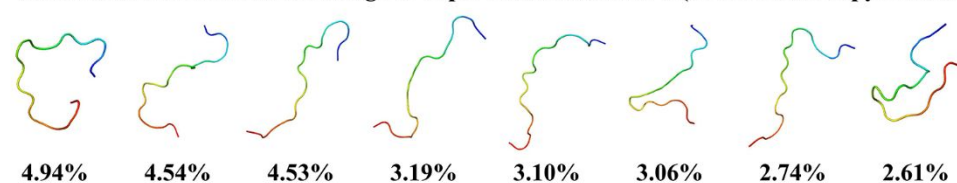

**Figure S31.** Conformation clustering of simulation for HEWL19.

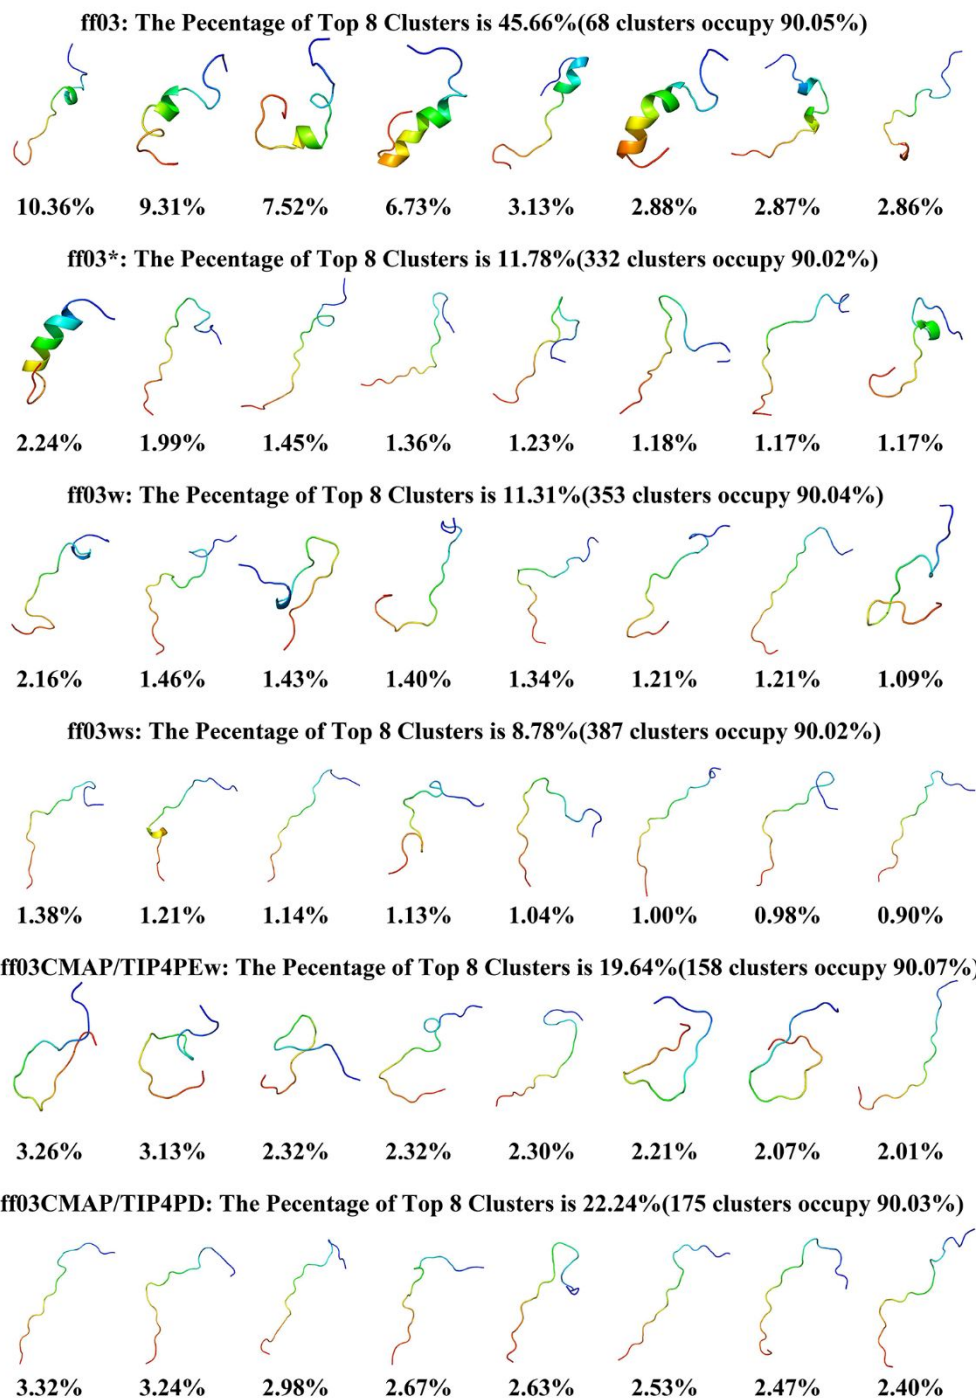

**Figure S32.** Conformation clustering of simulation for RS.

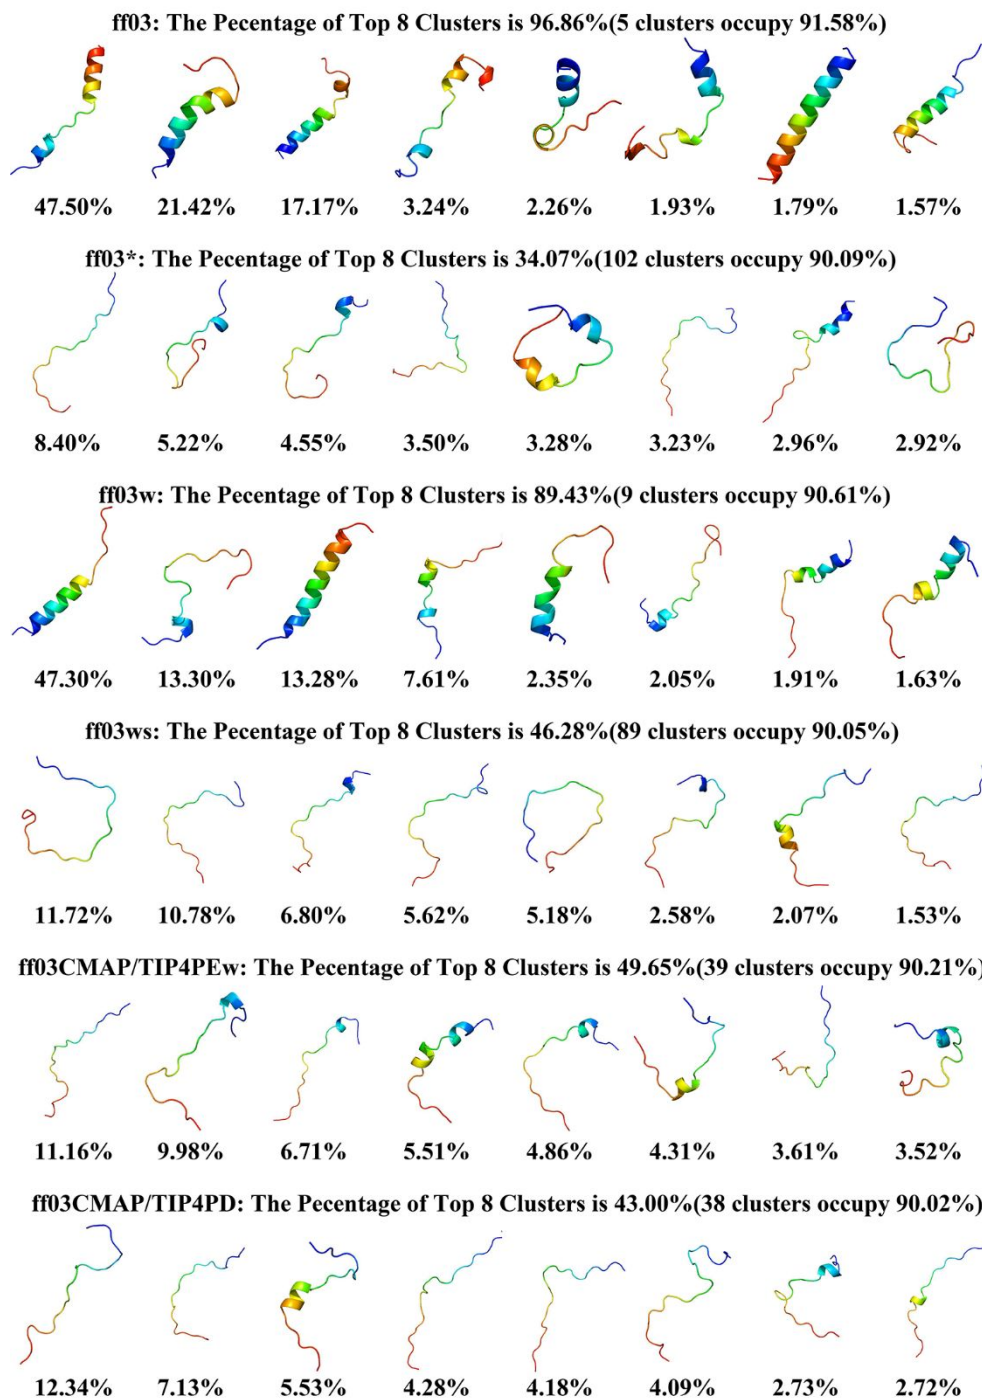

**Figure S33.** Conformation clustering of simulation for HIVRev.



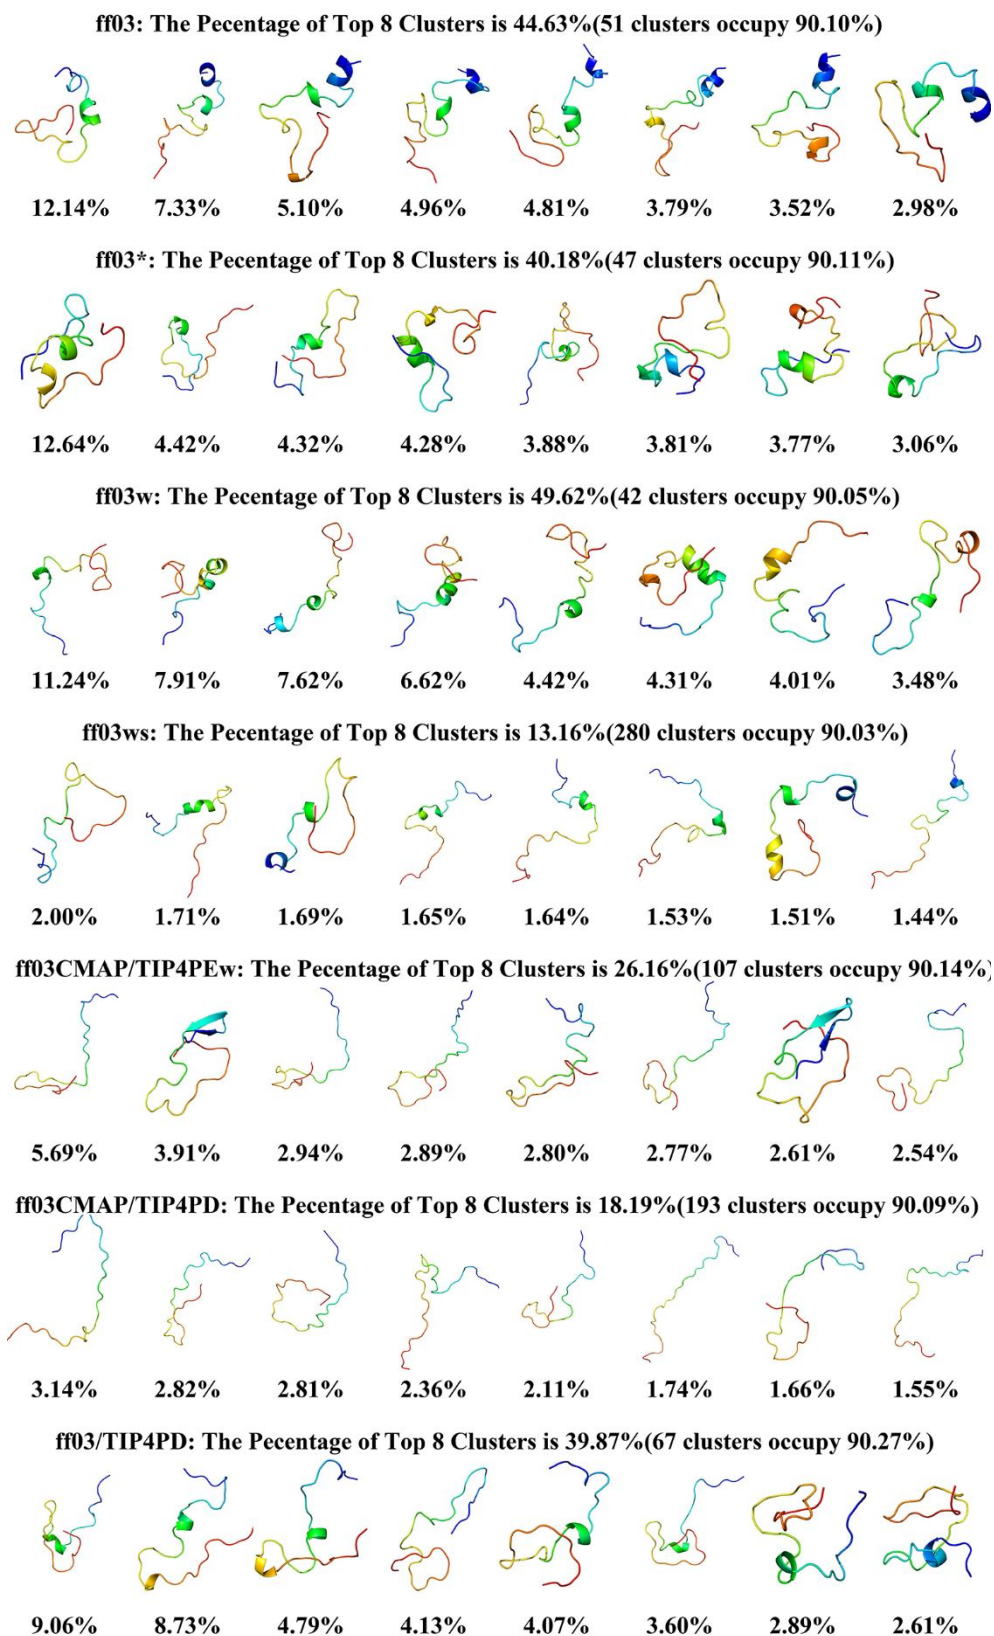

**Figure S34.** Conformation clustering of simulation for A $\beta$ 40.

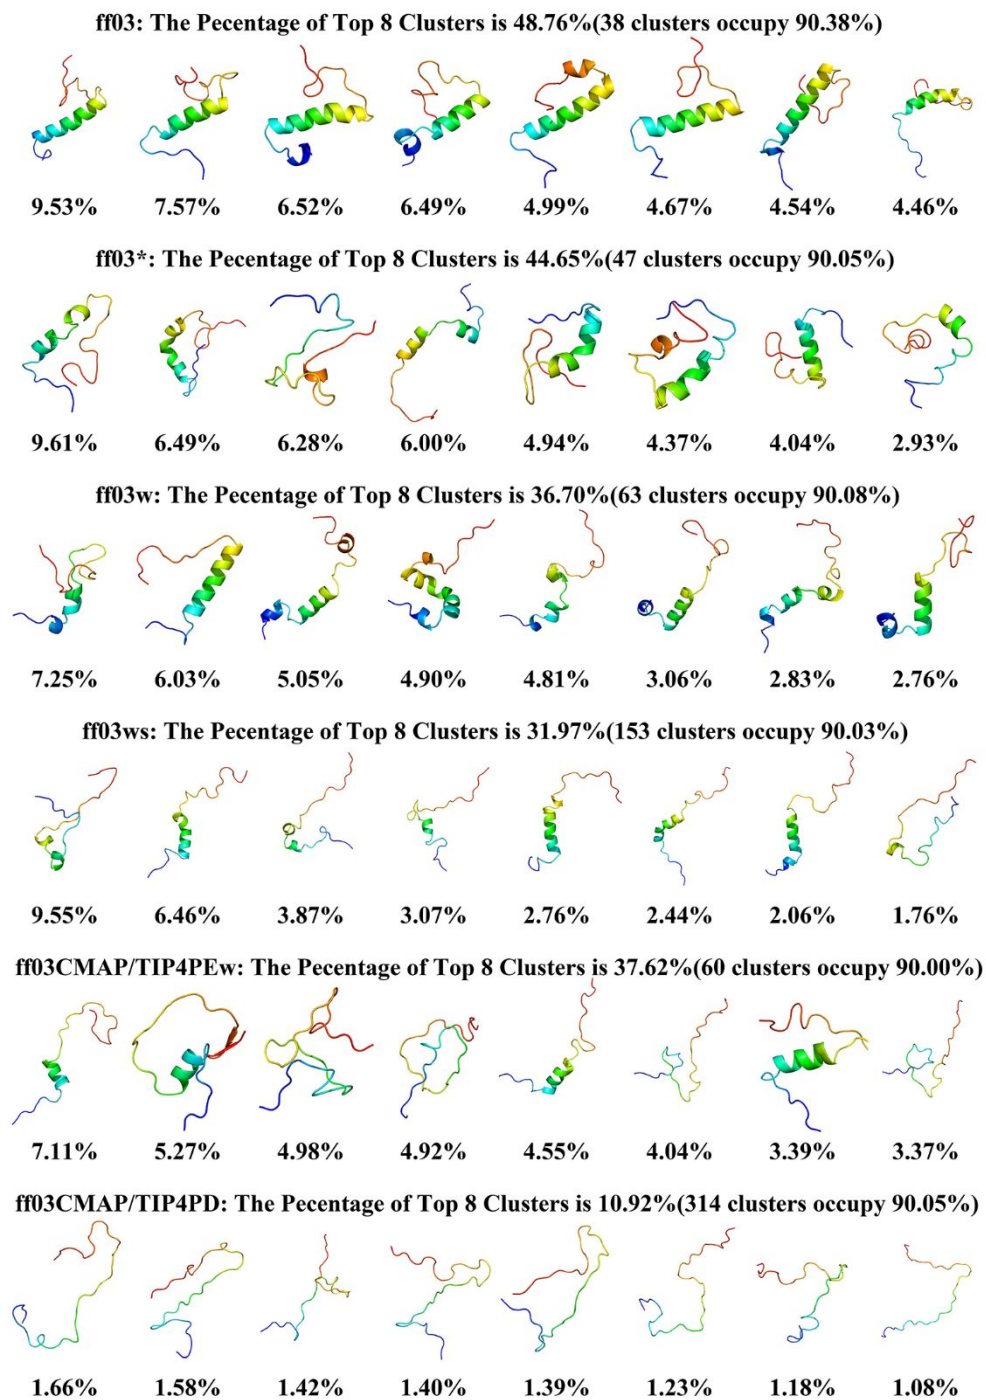

**Figure S35.** Conformation clustering of simulation for A $\beta$ 42.

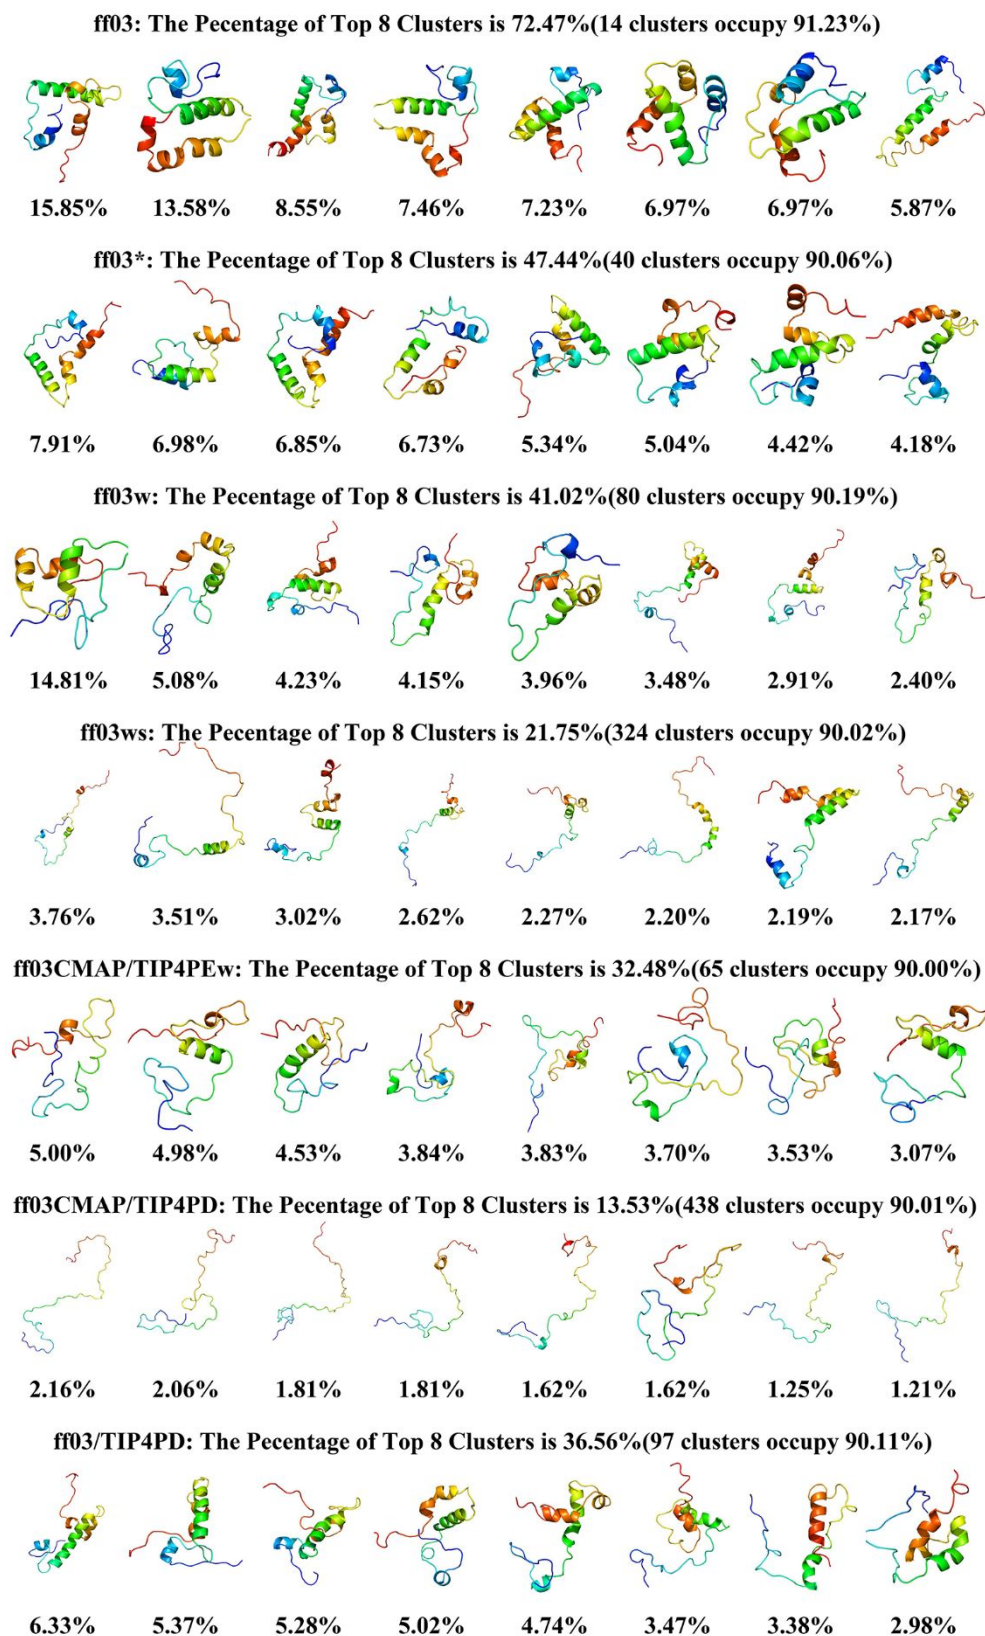

**Figure S36.** Conformation clustering of simulation for ACTR.



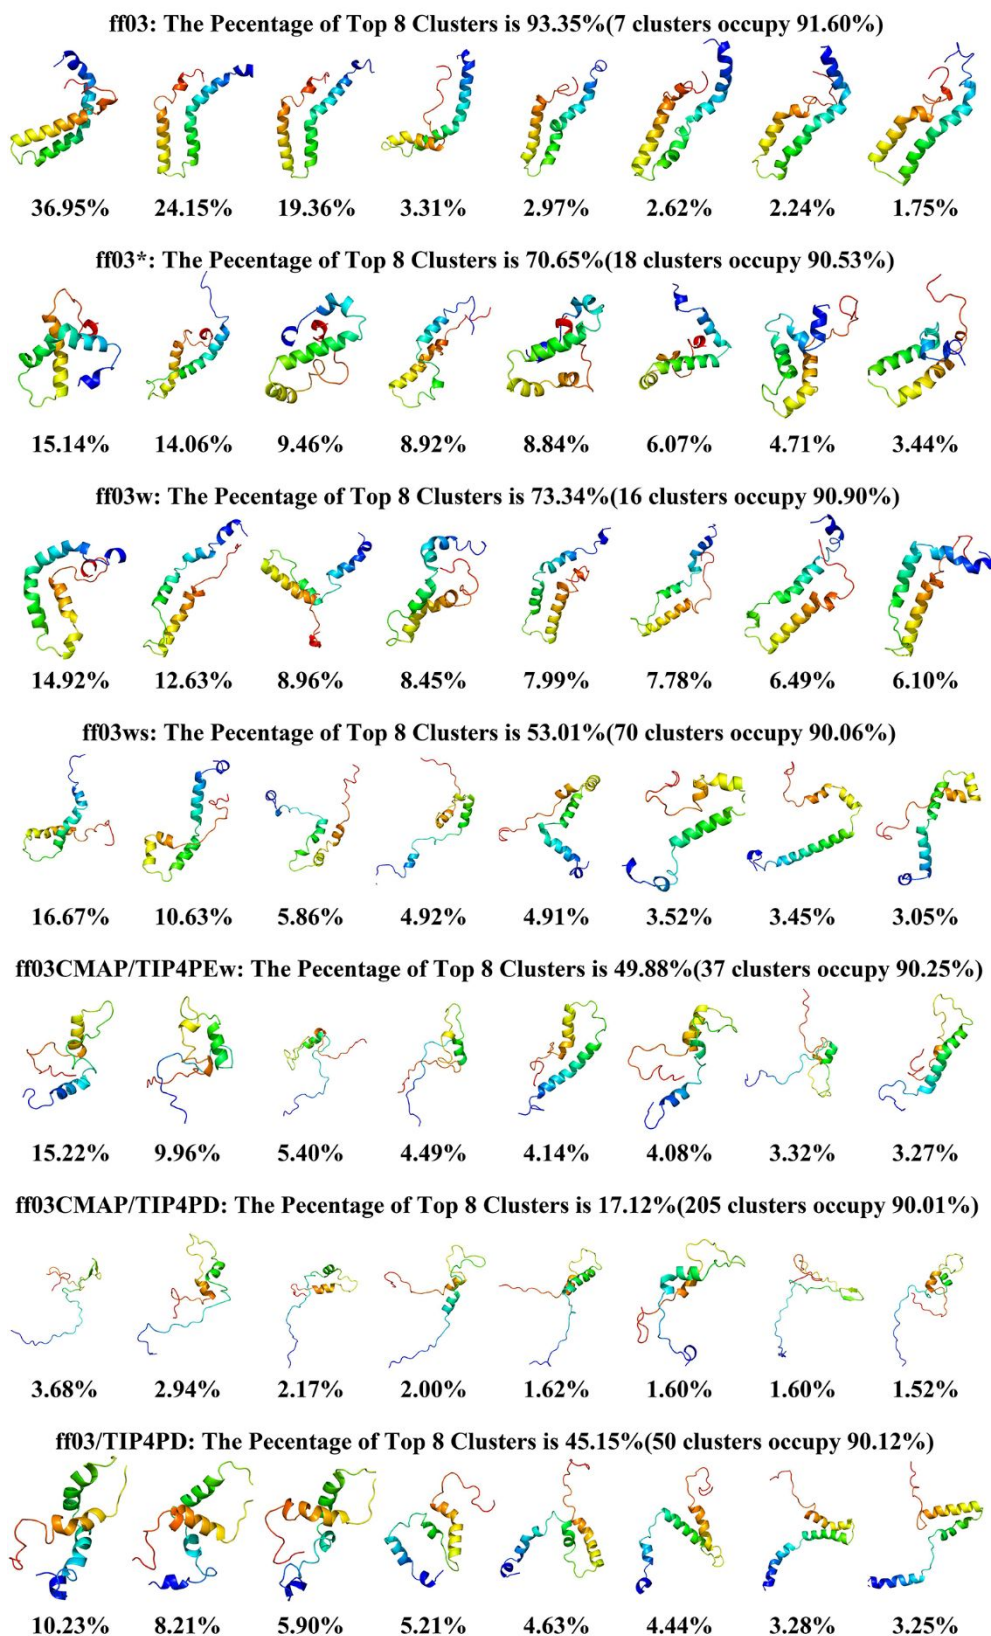

**Figure S37.** Conformation clustering of simulation for IA3.

**ff03: The Percentage of Top 8 Clusters is 62.14%(27 clusters occupy 90.63%)**

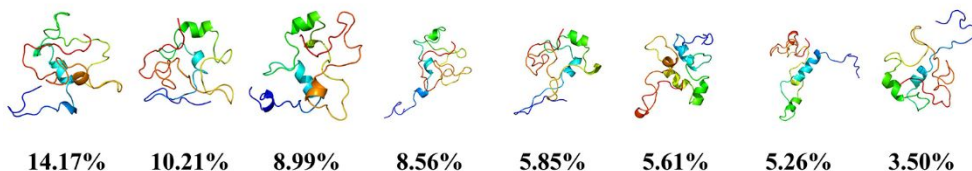

**ff03\*: The Percentage of Top 8 Clusters is 47.25%(54 clusters occupy 90.05%)**

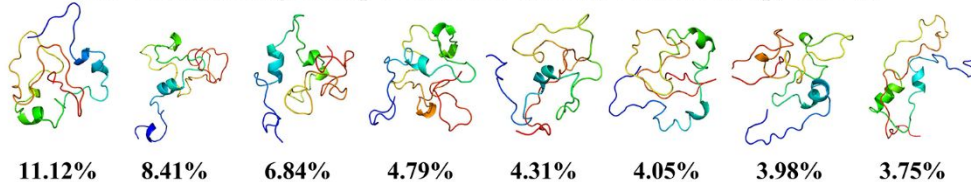

**ff03w: The Percentage of Top 8 Clusters is 40.35%(111 clusters occupy 90.05%)**

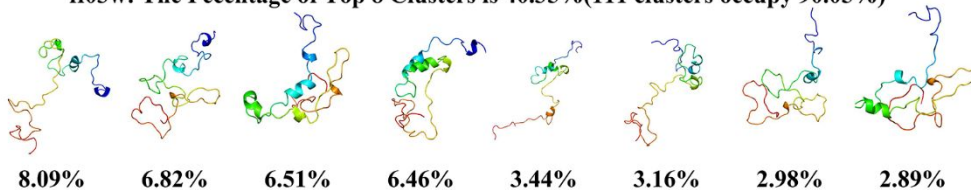

**ff03ws: The Percentage of Top 8 Clusters is 39.58%(162 clusters occupy 90.04%)**

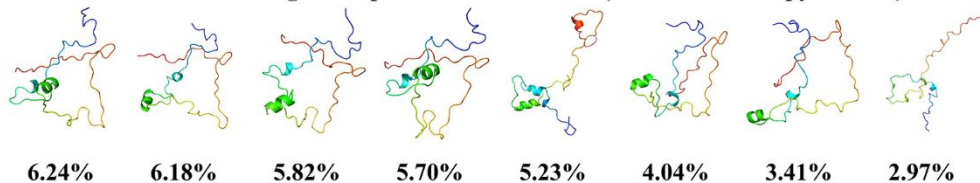

**ff03CMAP/TIP4PEw: The Percentage of Top 8 Clusters is 60.90%(19 clusters occupy 90.58%)**

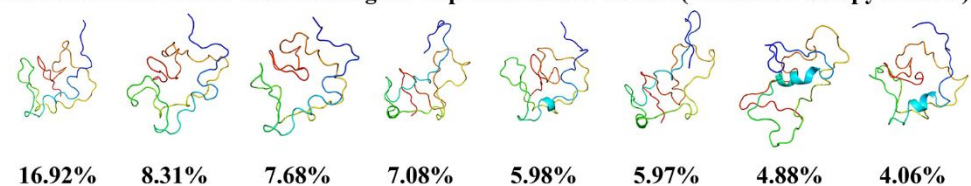

**ff03CMAP/TIP4PD: The Percentage of Top 8 Clusters is 33.99%(58 clusters occupy 90.24%)**

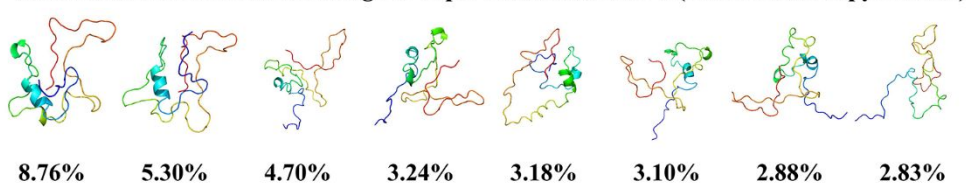

**Figure S38.** Conformation clustering of simulation for p53N.

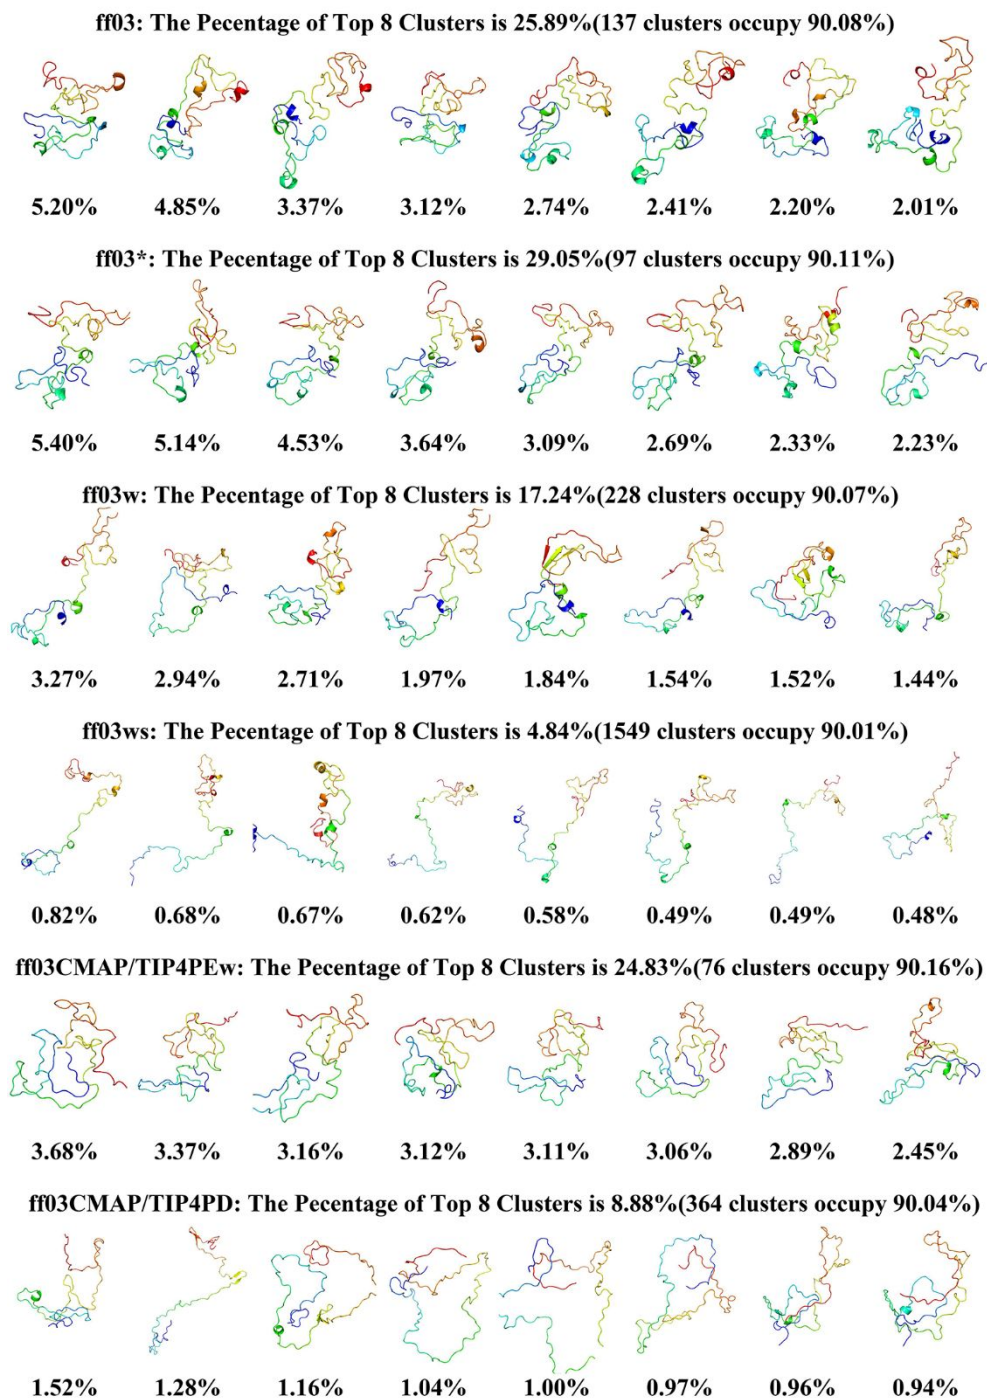

**Figure S39.** Conformation clustering of simulation for tauF4.



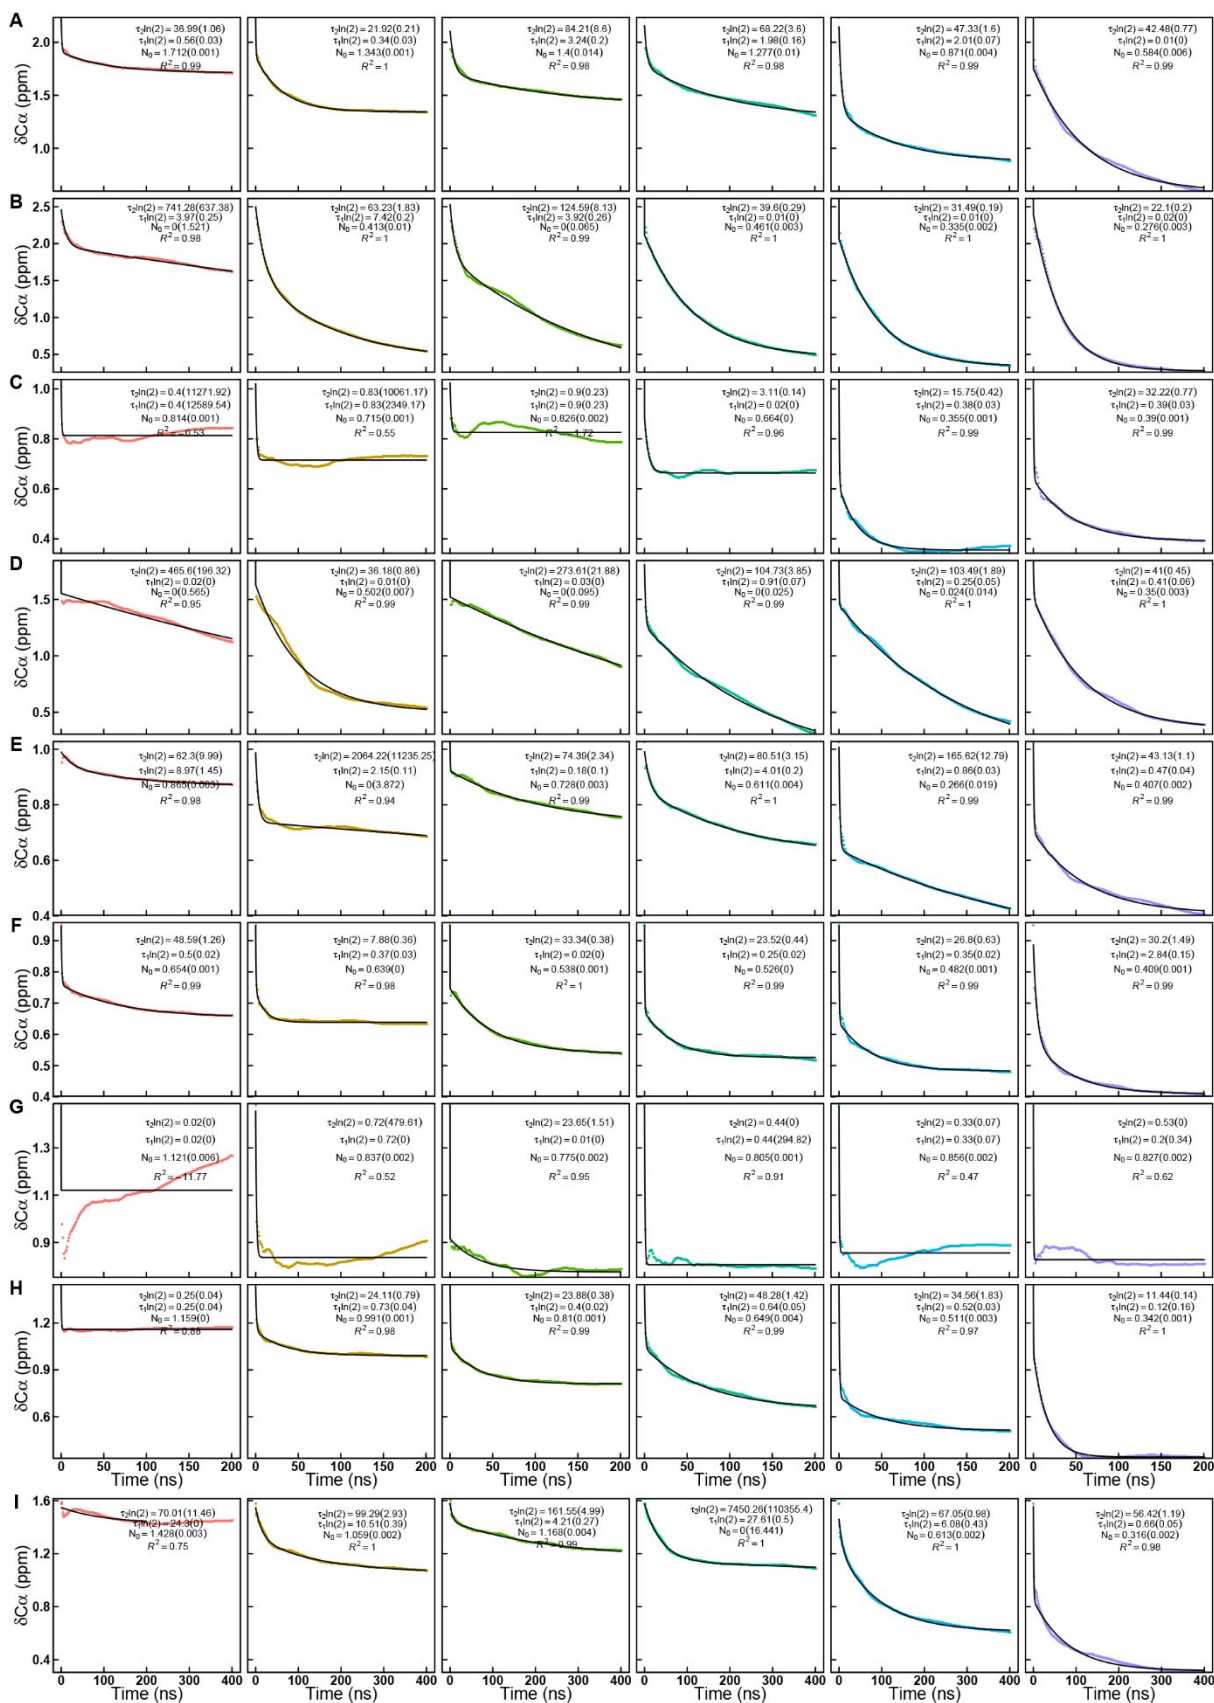

**Figure S40.** Biphasic exponential decay model fitting for disordered proteins. (A) IA3, (B) RS, (C) A $\beta$ 40, (D) HIVRev, (E) p53N, (F) tauF4, (G) HEWL19 (H) ACTR for 200ns MD simulation and (I) A $\beta$ 42 for 400ns MD simulation. Black solid line means the fit curve and colored dot means the simulated values for different force fields.  $\tau_1$  and  $\tau_2$  are in nanosecond,  $N_0$  is in ppm, and  $R^2$  is unitless.

## Reference:

- [1].Best, R. B.; Hummer, G., Optimized molecular dynamics force fields applied to the helix-coil transition of polypeptides. *The journal of physical chemistry. B* **2009**, *113* (26), 9004-15.
- [2].Graf, J.; Nguyen, P. H.; Stock, G.; Schwalbe, H., Structure and dynamics of the homologous series of alanine peptides: a joint molecular dynamics/NMR study. *Journal of the American Chemical Society* **2007**, *129* (5), 1179-89.
- [3].Vogeli, B.; Kazemi, S.; Guntert, P.; Riek, R., Spatial elucidation of motion in proteins by ensemble-based structure calculation using exact NOEs. *Nat Struct Mol Biol* **2012**, *19* (10), 1053-7.
- [4].Vogeli, B.; Ying, J.; Grishaev, A.; Bax, A., Limits on variations in protein backbone dynamics from precise measurements of scalar couplings. *Journal of the American Chemical Society* **2007**, *129* (30), 9377-85.
- [5].Yao, L.; Grishaev, A.; Cornilescu, G.; Bax, A., Site-specific backbone amide (<sup>15</sup>N) chemical shift anisotropy tensors in a small protein from liquid crystal and cross-correlated relaxation measurements. *Journal of the American Chemical Society* **2010**, *132* (12), 4295-309.
- [6].Biamonti, C., Structural and dynamic investigations of macromolecular recognition processes by nuclear magnetic resonance spectroscopy. **1997**.
- [7].Balasubramanian, S.; Nirmala, R.; Beveridge, D. L.; Bolton, P. H., Comparison of the <sup>13</sup>C relaxation times and proton scalar couplings of BPTI with values predicted by molecular dynamics. *J Magn Reson B* **1994**, *104* (3), 240-9.
- [8].Kremer, W.; Schuler, B.; Harrieder, S.; Geyer, M.; Gronwald, W.; Welker, C.; Jaenicke, R.; Kalbitzer, H. R., Solution NMR structure of the cold-shock protein from the hyperthermophilic bacterium *Thermotoga maritima*. *Eur J Biochem* **2001**, *268* (9), 2527-39.
- [9].Cornilescu, G.; Marquardt, J. L.; Ottiger, M.; Bax, A., Validation of protein structure from anisotropic carbonyl chemical shifts in a dilute liquid crystalline phase. *Journal of the American Chemical Society* **1998**, *120* (27), 6836-6837.
- [10].Wang, A. C.; Bax, A., Determination of the backbone dihedral angles  $\varphi$  in human ubiquitin from reparametrized empirical Karplus equations. *Journal of the American Chemical Society* **1996**, *118* (10), 2483-2494.
- [11].Schmidt, J. M.; Hua, Y.; Lohr, F., Correlation of (<sup>2</sup>J) couplings with protein secondary structure. *Proteins* **2010**, *78* (6), 1544-62.
- [12].Schmidt, J. M.; Howard, M. J.; Maestre-Martinez, M.; Perez, C. S.; Lohr, F., Variation in protein C(alpha)-related one-bond J couplings. *Magn Reson Chem* **2009**, *47* (1), 16-30.
- [13].Chou, J. J.; Case, D. A.; Bax, A., Insights into the mobility of methyl-bearing side chains in proteins from <sup>3</sup>J CC and <sup>3</sup>J CN couplings. *Journal of the American Chemical Society* **2003**, *125* (29), 8959-8966.
- [14].Ottiger, M.; Bax, A., Determination of Relative N-HN, N-C', C $\alpha$ -C', and C $\alpha$ -H $\alpha$  Effective Bond Lengths in a Protein by NMR in a Dilute Liquid Crystalline Phase. *Journal of the American Chemical Society* **1998**, *120* (47), 12334-12341.
- [15].Hus, J. C.; Peti, W.; Griesinger, C.; Bruschweiler, R., Self-consistency analysis of dipolar couplings in multiple alignments of ubiquitin. *Journal of the American Chemical Society* **2003**, *125* (19), 5596-7.
- [16].Tjandra, N.; Feller, S. E.; Pastor, R. W.; Bax, A., Rotational diffusion anisotropy of human ubiquitin from <sup>15</sup>N NMR relaxation. *Journal of the American Chemical Society* **1995**, *117* (50), 12562-12566.
- [17].Lee, A. L.; Flynn, P. F.; Wand, A. J., Comparison of <sup>2</sup>H and <sup>13</sup>C NMR relaxation techniques for the study of protein methyl group dynamics in solution. *Journal of the American Chemical Society* **1999**, *121* (12), 2891-2902.
- [18].Brenner, A. K.; Kieffer, B.; Trave, G.; Froystein, N. A.; Raae, A. J., Thermal stability of chicken brain alpha-spectrin repeat 17: a spectroscopic study. *J Biomol NMR* **2012**, *53* (2), 71-83.
- [19].Xiang, S.; Gapsys, V.; Kim, H. Y.; Bessonov, S.; Hsiao, H. H.; Mohlmann, S.; Klaukien, V.; Ficner, R.; Becker, S.; Urlaub, H.; Luhrmann, R.; de Groot, B.; Zweckstetter, M., Phosphorylation drives a dynamic switch in serine/arginine-rich proteins. *Structure* **2013**, *21* (12), 2162-74.
- [20].Rauscher, S.; Gapsys, V.; Gajda, M. J.; Zweckstetter, M.; de Groot, B. L.; Grubmuller, H., Structural Ensembles of Intrinsically Disordered Proteins Depend Strongly on Force Field: A Comparison to Experiment. *Journal of chemical theory and computation* **2015**, *11* (11), 5513-24.
- [21].Casu, F.; Duggan, B. M.; Hennig, M., The arginine-rich RNA-binding motif of HIV-1 Rev is intrinsically disordered and folds upon



RRE binding. *Biophys J* **2013**, *105* (4), 1004-17.

[22]. Yamaguchi, T.; Matsuzaki, K.; Hoshino, M., Transient formation of intermediate conformational states of amyloid-beta peptide revealed by heteronuclear magnetic resonance spectroscopy. *FEBS Lett* **2011**, *585* (7), 1097-102.

[23]. Roche, J.; Shen, Y.; Lee, J. H.; Ying, J.; Bax, A., Monomeric Abeta(1-40) and Abeta(1-42) Peptides in Solution Adopt Very Similar Ramachandran Map Distributions That Closely Resemble Random Coil. *Biochemistry* **2016**, *55* (5), 762-75.

[24]. Yan, Y.; McCallum, S. A.; Wang, C., M35 oxidation induces Abeta40-like structural and dynamical changes in Abeta42. *Journal of the American Chemical Society* **2008**, *130* (16), 5394-5.

[25]. Granata, D.; Baftizadeh, F.; Habchi, J.; Galvagnion, C.; De Simone, A.; Camilloni, C.; Laio, A.; Vendruscolo, M., The inverted free energy landscape of an intrinsically disordered peptide by simulations and experiments. *Sci Rep* **2015**, *5*, 15449.

[26]. Walti, M. A.; Orts, J.; Vogeli, B.; Campioni, S.; Riek, R., Solution NMR studies of recombinant Abeta(1-42): from the presence of a micellar entity to residual beta-sheet structure in the soluble species. *Chembiochem* **2015**, *16* (4), 659-69.

[27]. Ebert, M. O.; Bae, S. H.; Dyson, H. J.; Wright, P. E., NMR relaxation study of the complex formed between CBP and the activation domain of the nuclear hormone receptor coactivator ACTR. *Biochemistry* **2008**, *47* (5), 1299-308.

[28]. Iesmantavicius, V.; Jensen, M. R.; Ozenne, V.; Blackledge, M.; Poulsen, F. M.; Kjaergaard, M., Modulation of the intrinsic helix propensity of an intrinsically disordered protein reveals long-range helix-helix interactions. *Journal of the American Chemical Society* **2013**, *135* (27), 10155-63.

[29]. Kjaergaard, M.; Norholm, A. B.; Hendus-Altenburger, R.; Pedersen, S. F.; Poulsen, F. M.; Kragelund, B. B., Temperature-dependent structural changes in intrinsically disordered proteins: formation of alpha-helices or loss of polyproline II? *Protein Sci* **2010**, *19* (8), 1555-64.

[30]. Green, T. B.; Ganesh, O.; Perry, K.; Smith, L.; Phylip, L. H.; Logan, T. M.; Hagen, S. J.; Dunn, B. M.; Edison, A. S., IA3, an aspartic proteinase inhibitor from *Saccharomyces cerevisiae*, is intrinsically unstructured in solution. *Biochemistry* **2004**, *43* (14), 4071-81.

[31]. Wong, T. S.; Rajagopalan, S.; Freund, S. M.; Rutherford, T. J.; Andreeva, A.; Townsley, F. M.; Petrovich, M.; Fersht, A. R., Biophysical characterizations of human mitochondrial transcription factor A and its binding to tumor suppressor p53. *Nucleic Acids Res* **2009**, *37* (20), 6765-83.

[32]. Sibille, N.; Huvent, I.; Fauquant, C.; Verdegem, D.; Amniai, L.; Leroy, A.; Wieruszeski, J. M.; Lippens, G.; Landrieu, I., Structural characterization by nuclear magnetic resonance of the impact of phosphorylation in the proline-rich region of the disordered Tau protein. *Proteins* **2012**, *80* (2), 454-62.

[33]. Honda, S.; Akiba, T.; Kato, Y. S.; Sawada, Y.; Sekijima, M.; Ishimura, M.; Ooishi, A.; Watanabe, H.; Odahara, T.; Harata, K., Crystal structure of a ten-amino acid protein. *Journal of the American Chemical Society* **2008**, *130* (46), 15327-31.

[34]. Shalongo, W.; Dugad, L.; Stellwagen, E., Distribution of helicity within the model peptide acetyl (AAQAA) 3amide. *Journal of the American Chemical Society* **1994**, *116* (18), 8288-8293.

[35]. Munoz, V.; Thompson, P. A.; Hofrichter, J.; Eaton, W. A., Folding dynamics and mechanism of  $\beta$ -hairpin formation. *Nature* **1997**, *390* (6656), 196.
